# Supplementary material for: Distinct TP53 Mutation Types Exhibit Increased Sensitivity to Ferroptosis Independently of Changes in Iron Regulatory Protein Activity
Source: MDPI journal article supplement (doi:10.3390/ijms21186751), 2020-09-15
Supplement: s1 [file s1]

# Certificate of Analysis

Project ID: U9202EC110-1**Construct Information:**Gene Name: TP53 (R249S)Clone ID: I52118Cloning Vector: pcDNA5-TOGene Length: 1194 bpCloning Strategy: CloneEZ

| QC Items             | Specifications                                                                                  | Results |                                    |
|----------------------|-------------------------------------------------------------------------------------------------|---------|------------------------------------|
| Sequencing Alignment | Sequencing results are consistent with the targeted insert sequence.                            | Pass    | Consistent                         |
| Vector Sequence      | The flanking sequences of the cloning site are correct.                                         | Pass    | Correct<br>Shown in the SQD file   |
| Restriction Digests  | The size of inserted fragment is correct and free of unexpected bands suggesting contamination. | Pass    | Correct<br>Shown in attachment 1   |
| DNA Quality          | Miniprep: 4 µg<br>OD260/280=1.8~2.0<br>Free of contamination                                    | Pass    | ≥ 4 µg<br>OD260/280=1.86<br>Pure   |
| Quality grade        | Research Grade                                                                                  | Pass    | Research Grade                     |
| Appearance           | Clear and free of foreign particles.                                                            | Pass    | Clear<br>Free of foreign particles |
| Additional Test      |                                                                                                 | N/A     |                                    |

**NOTE**

| Shipping at      | Plasmid Storing at | Bacstab Storing at | Glycerol Stock Storing at |
|------------------|--------------------|--------------------|---------------------------|
| Room Temperature | -20°C              | 4°C                | -20°C/-80°C               |

*Morgan*

Certified by:

Date: **03/24/2019**

Thank you for your patronage to our Gene services! To maintain this working relationship, we shall be grateful if you can add our webpage URL into your lab website. As a token of appreciation, you will be rewarded by 1,000 EZcoupon™ points. For more information, please contact us by e-mail at [web@genscript.com](mailto:web@genscript.com).

For research use only

860 Centennial Ave., Piscataway, NJ 08854, USA

Toll-Free: 1-877-436-7274

Tel: 1-732-885-9188

Fax: 1-732-210-0262

Email: [order@genscript.com](mailto:order@genscript.com)Web: [www.genscript.com](http://www.genscript.com)

## Plasmid Construct Map

The gene was cloned in pcDNA5-TO by CloneEZ.

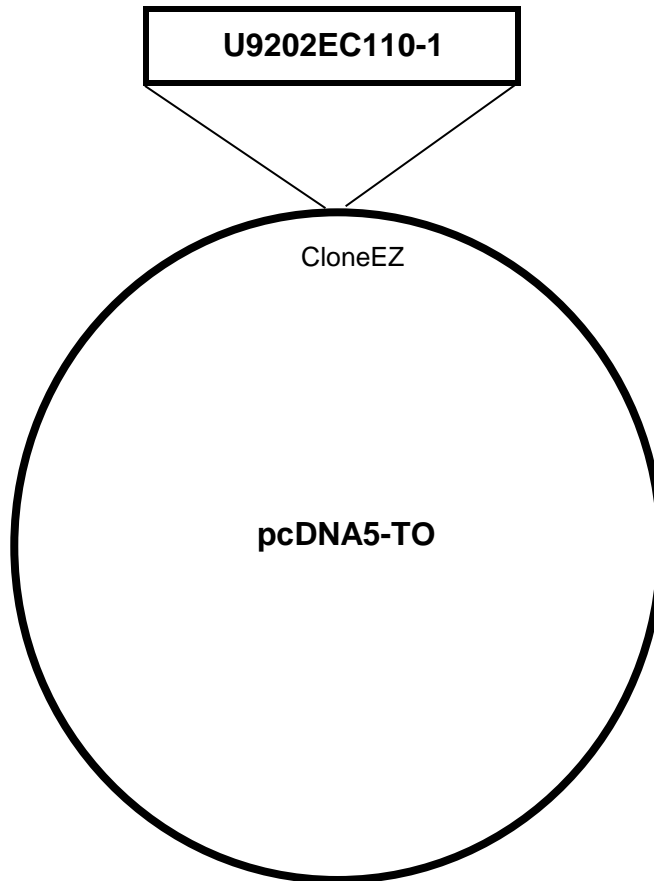

## Enzyme Digestion

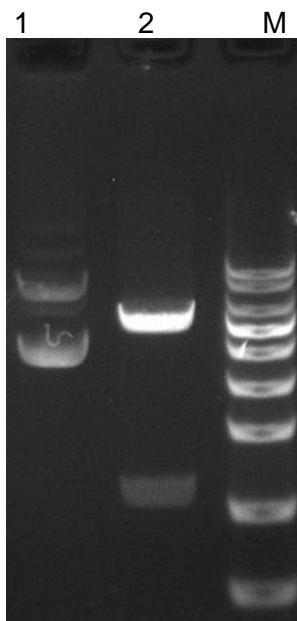

Lane M: KB Ladder  
Lane 1: U9202EC110-1 plasmid  
Lane 2: U9202EC110-1 plasmid digested  
by PmeI

**Digestion Conditions:**  
About 300ng plasmid digested  
Digestion in water-bath, 37°C for 40 minutes  
1% Agarose Gel

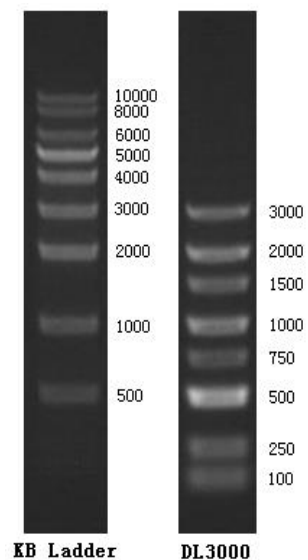

For research use only

860 Centennial Ave., Piscataway, NJ 08854, USA
