# Supplementary material for: Distinct TP53 Mutation Types Exhibit Increased Sensitivity to Ferroptosis Independently of Changes in Iron Regulatory Protein Activity
Source: MDPI journal article supplement (doi:10.3390/ijms21186751), 2020-09-15
Supplement: s1 [file s1]

# Certificate of Analysis

**Project ID:** U9202EC110-3
**Construct Information:**
**Gene Name:** TP53 (G245S)
**Clone ID:** I52126
**Cloning Vector:** pcDNA5-TO
**Gene Length:** 1194 bp
**Cloning Strategy:** CloneEZ

| QC Items                    | Specifications                                                                                  | Results |                                    |
|-----------------------------|-------------------------------------------------------------------------------------------------|---------|------------------------------------|
| <b>Sequencing Alignment</b> | Sequencing results are consistent with the targeted insert sequence.                            | Pass    | Consistent                         |
| <b>Vector Sequence</b>      | The flanking sequences of the cloning site are correct.                                         | Pass    | Correct<br>Shown in the SQD file   |
| <b>Restriction Digests</b>  | The size of inserted fragment is correct and free of unexpected bands suggesting contamination. | Pass    | Correct<br>Shown in attachment 1   |
| <b>DNA Quality</b>          | Miniprep: 4 µg<br>OD260/280=1.8~2.0<br>Free of contamination                                    | Pass    | ≥ 4 µg<br>OD260/280=1.89<br>Pure   |
| <b>Quality grade</b>        | Research Grade                                                                                  | Pass    | Research Grade                     |
| <b>Appearance</b>           | Clear and free of foreign particles.                                                            | Pass    | Clear<br>Free of foreign particles |
| <b>Additional Test</b>      |                                                                                                 | N/A     |                                    |

**NOTE**

| Shipping at      | Plasmid Storing at | Bacstab Storing at | Glycerol Stock Storing at |
|------------------|--------------------|--------------------|---------------------------|
| Room Temperature | -20°C              | 4°C                | -20°C/-80°C               |


**Certified by:**
**Date:** 03/24/2019

Thank you for your patronage to our Gene services! To maintain this working relationship, we shall be grateful if you can add our webpage URL into your lab website. As a token of appreciation, you will be rewarded by 1,000 EZcoupon™ points. For more information, please contact us by e-mail at web@genscript.com.

For research use only

860 Centennial Ave., Piscataway, NJ 08854, USA

Toll-Free: 1-877-436-7274

Tel: 1-732-885-9188

Fax: 1-732-210-0262

Email: order@genscript.com

Web: www.genscript.com

## Plasmid Construct Map

The gene was cloned in pcDNA5-TO by CloneEZ.

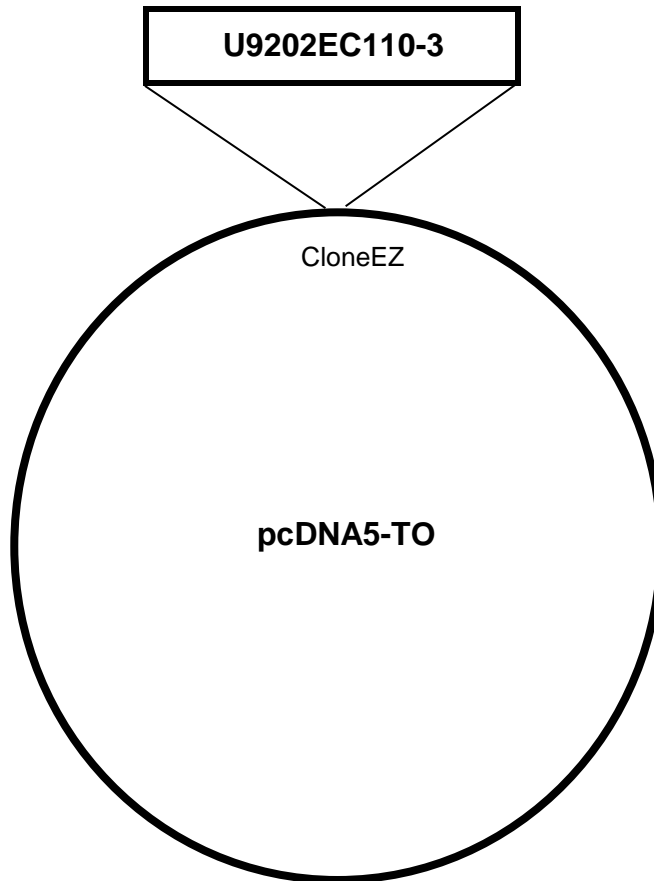

## Enzyme Digestion

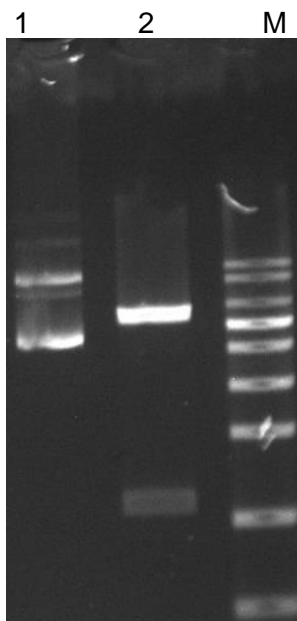

Lane M: KB Ladder  
Lane 1: U9202EC110-3 plasmid  
Lane 2: U9202EC110-3 plasmid digested  
by BamHI and XhoI

**Digestion Conditions:**  
About 300ng plasmid digested  
Digestion in water-bath, 37°C for 40 minutes  
1% Agarose Gel

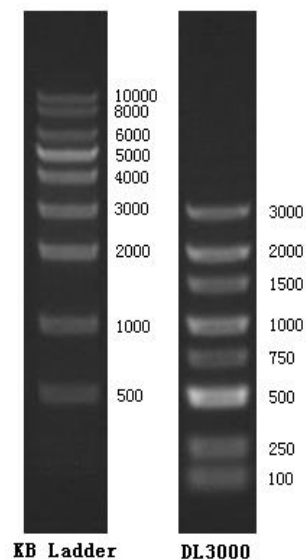

For research use only

860 Centennial Ave., Piscataway, NJ 08854, USA
