# Supplementary material for: Distinct TP53 Mutation Types Exhibit Increased Sensitivity to Ferroptosis Independently of Changes in Iron Regulatory Protein Activity
Source: MDPI journal article supplement (doi:10.3390/ijms21186751), 2020-09-15
Supplement: s1 [file s1]

# Certificate of Analysis

**Project ID:** U4129CB060-6  
**Lot No.:** U4129CB060S-6/G121358  
**Plasmid Name:** TP53 (H193Y) pcDNA5/TO  
**Quantity:** 100 µg(0.1 mg each,1 vial) **Concentration:** 1 mg/mL  
**Final Volume:** 100 µl **Final Buffer:** TE

| QC Items                   | Specifications                                                                                           | Results |                                                            |
|----------------------------|----------------------------------------------------------------------------------------------------------|---------|------------------------------------------------------------|
| <b>Appearance</b>          | Colorless, clear, free of precipitate or foreign particles                                               | Pass    | Colorless, clear, free of precipitate or foreign particles |
| <b>Identity</b>            | Co-migrates with reference DNA and/or size confirmed versus marker                                       | Pass    | Confirmed                                                  |
| <b>Restriction Digests</b> | Matches expected test                                                                                    | Pass    | Matched<br>Shown in attachment 1                           |
| <b>OD260/OD280</b>         | 1.8-2.0                                                                                                  | Pass    | 1.89                                                       |
| <b>Residual RNA</b>        | Not visible on agarose gel                                                                               | Pass    | Invisible                                                  |
| <b>Genomic DNA</b>         | Not visible on agarose gel                                                                               | Pass    | Invisible                                                  |
| <b>Endotoxin</b>           | <input checked="" type="checkbox"/> ≤ 0.01 EU/µg<br><input type="checkbox"/> No QC testing requested     | Pass    | ≤ 0.01 EU/µg                                               |
| <b>Bio-Burden Assay</b>    | <input checked="" type="checkbox"/> Bio-Burden Assay<br><input type="checkbox"/> No QC testing requested | Pass    | No viable organism                                         |
| <b>Additional Test</b>     |                                                                                                          | N/A     |                                                            |

## NOTE

| Shipping at      | Plasmid Storing at | Bacstab Storing at | Glycerol Stock Storing at |
|------------------|--------------------|--------------------|---------------------------|
| Room Temperature | -20°C              | 4°C                | -20°C/-80°C               |

Certified *Morgan* Date: 2017/3/14

Thank you for your patronage to our Gene services! To maintain this working relationship, we shall be grateful if you can add our webpage URL into your lab website. As a token of appreciation, you will be rewarded by 1,000 EZcoupon™ points. For more information, please contact us by e-mail at [web@genscript.com](mailto:web@genscript.com).

For research use only

860 Centennial Ave., Piscataway, NJ 08854, USA

Toll-Free: 1-877-436-7274

Tel: 1-732-885-9188

Fax: 1-732-210-0262

Email: [order@genscript.com](mailto:order@genscript.com)

Web: [www.genscript.com](http://www.genscript.com)

Attachment 1

# Enzyme Digestion

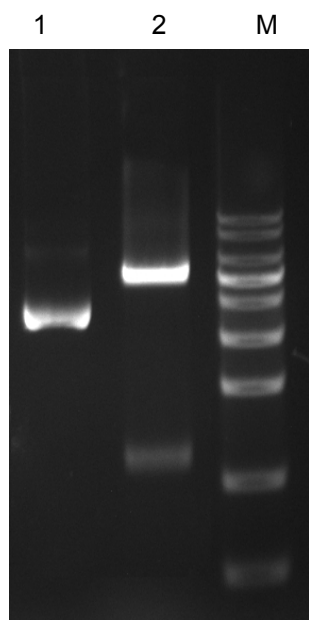

Lane M: KB Ladder  
Lane 1: U4129CB060-6 plasmid  
Lane 2: U4129CB060-6 plasmid digested  
by BamHI and XhoI

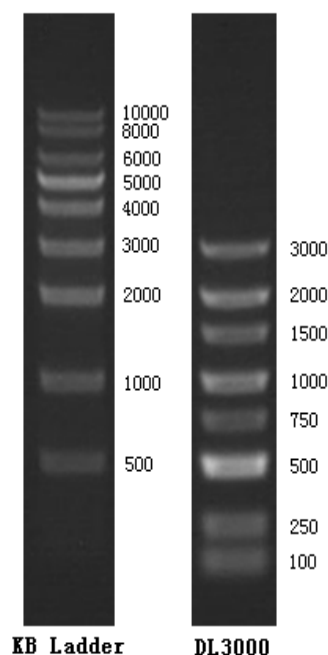

## Digestion Conditions:

About 300ng plasmid digested  
Digestion in water-bath, 37°C for 40 minutes  
1% Agarose Gel

For research use only

860 Centennial Ave., Piscataway, NJ 08854, USA

Toll-Free: 1-877-436-7274

Tel: 1-732-885-9188

Fax: 1-732-210-0262

Email: [order@genscript.com](mailto:order@genscript.com)

Web: [www.genscript.com](http://www.genscript.com)
