# Supplementary figures and images for: Distinct TP53 Mutation Types Exhibit Increased Sensitivity to Ferroptosis Independently of Changes in Iron Regulatory Protein Activity
Source: MDPI journal article supplement (doi:10.3390/ijms21186751), 2020-09-15

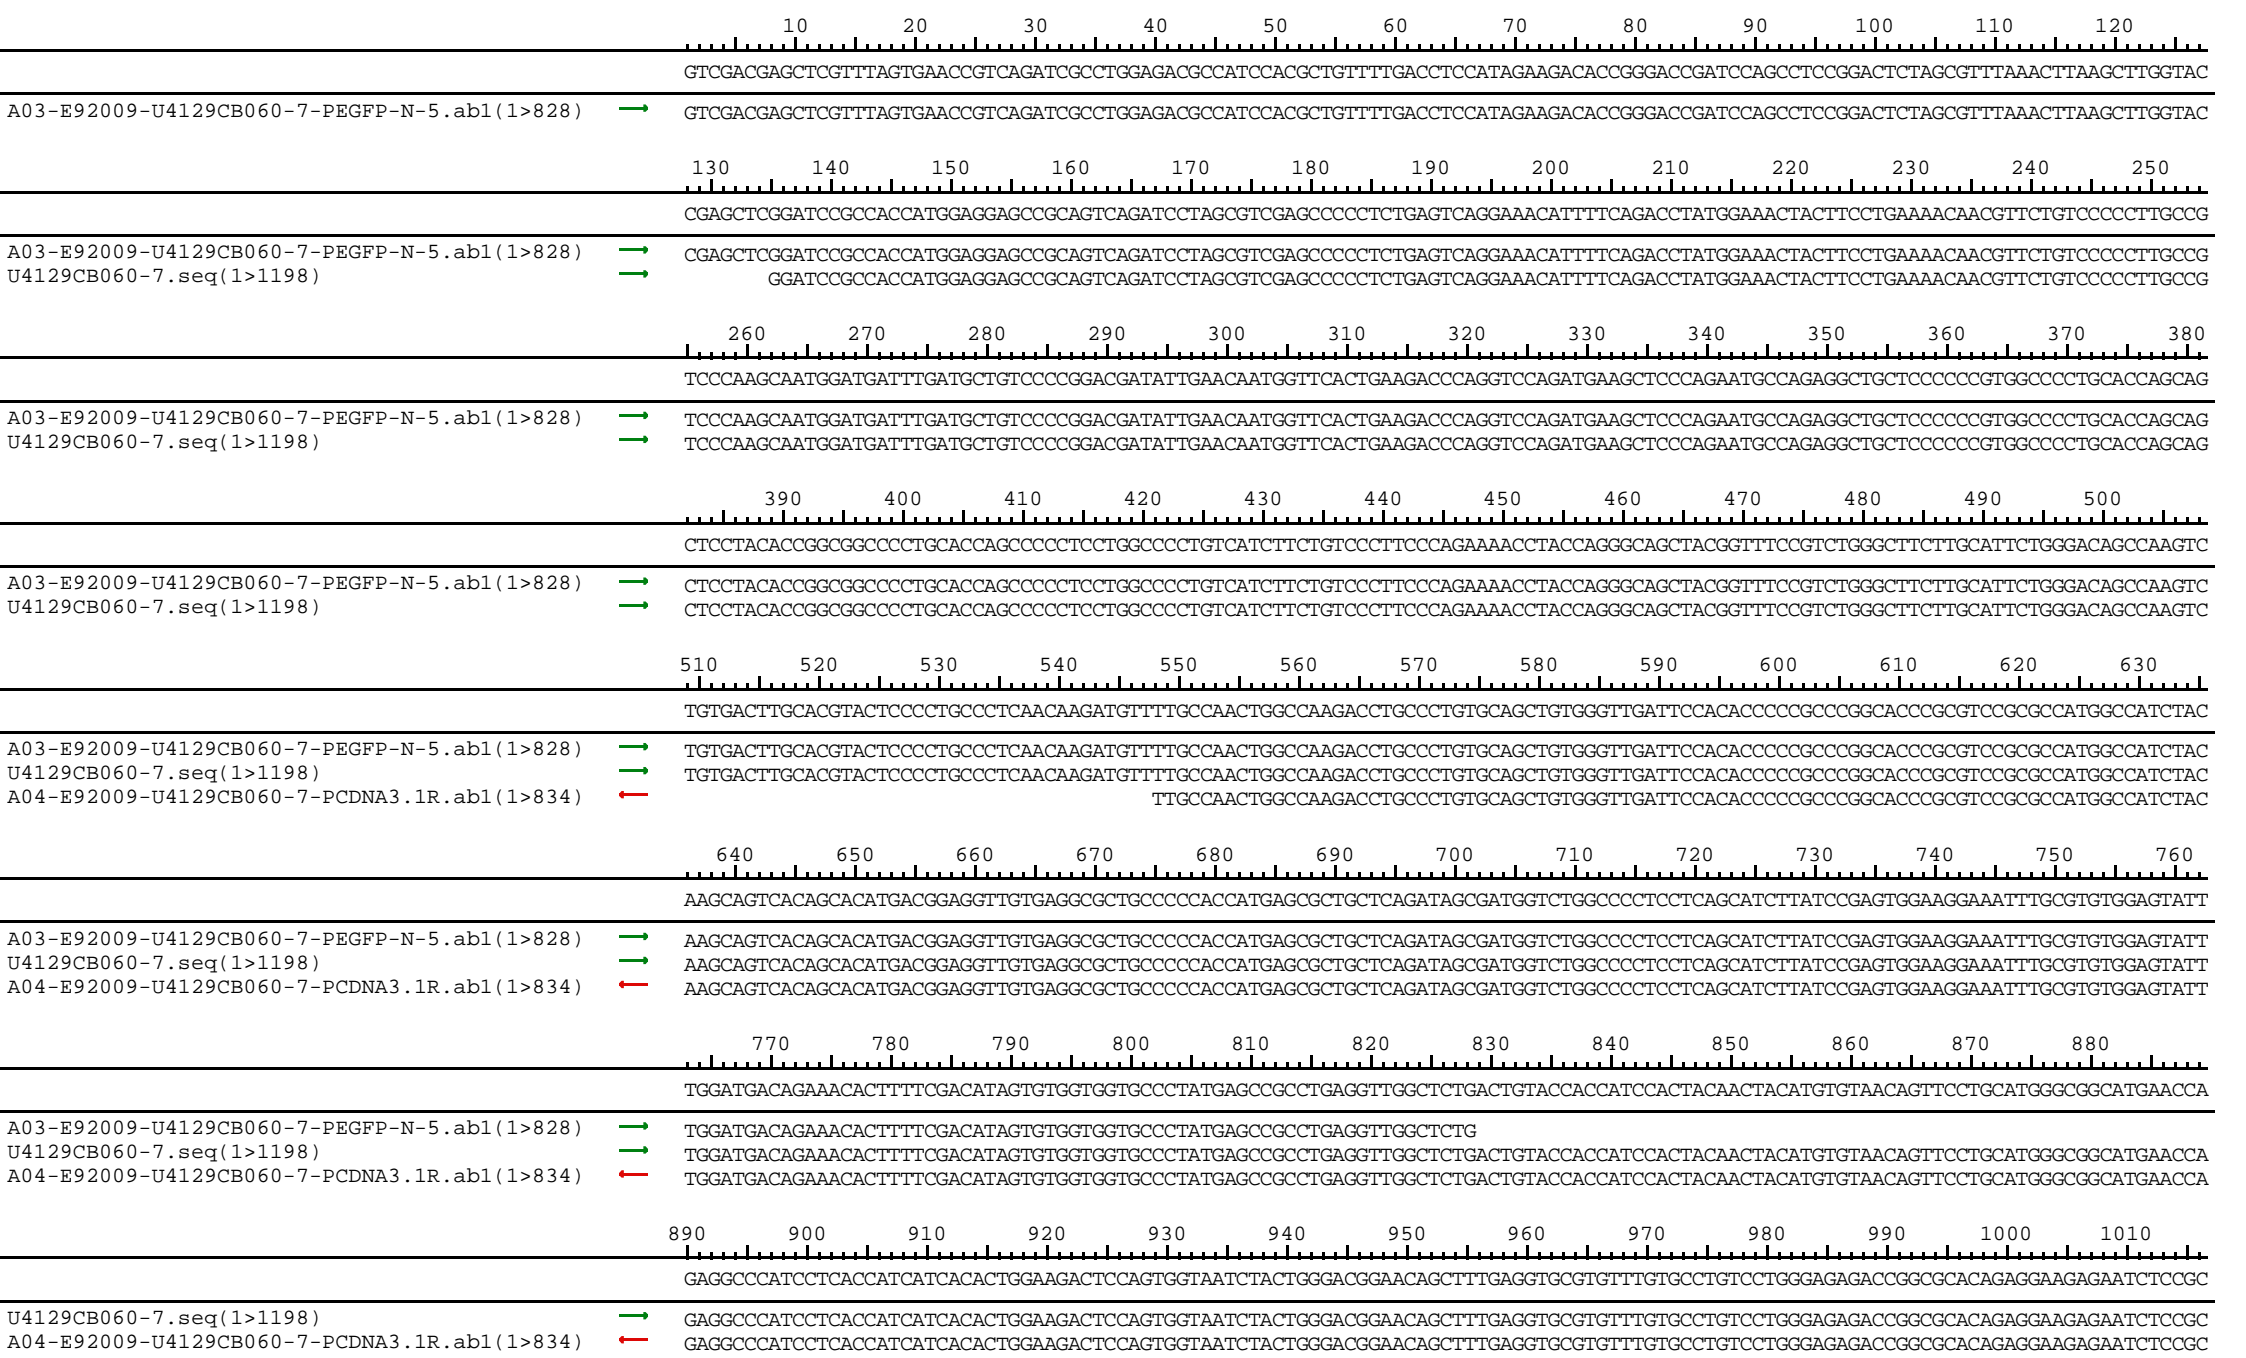

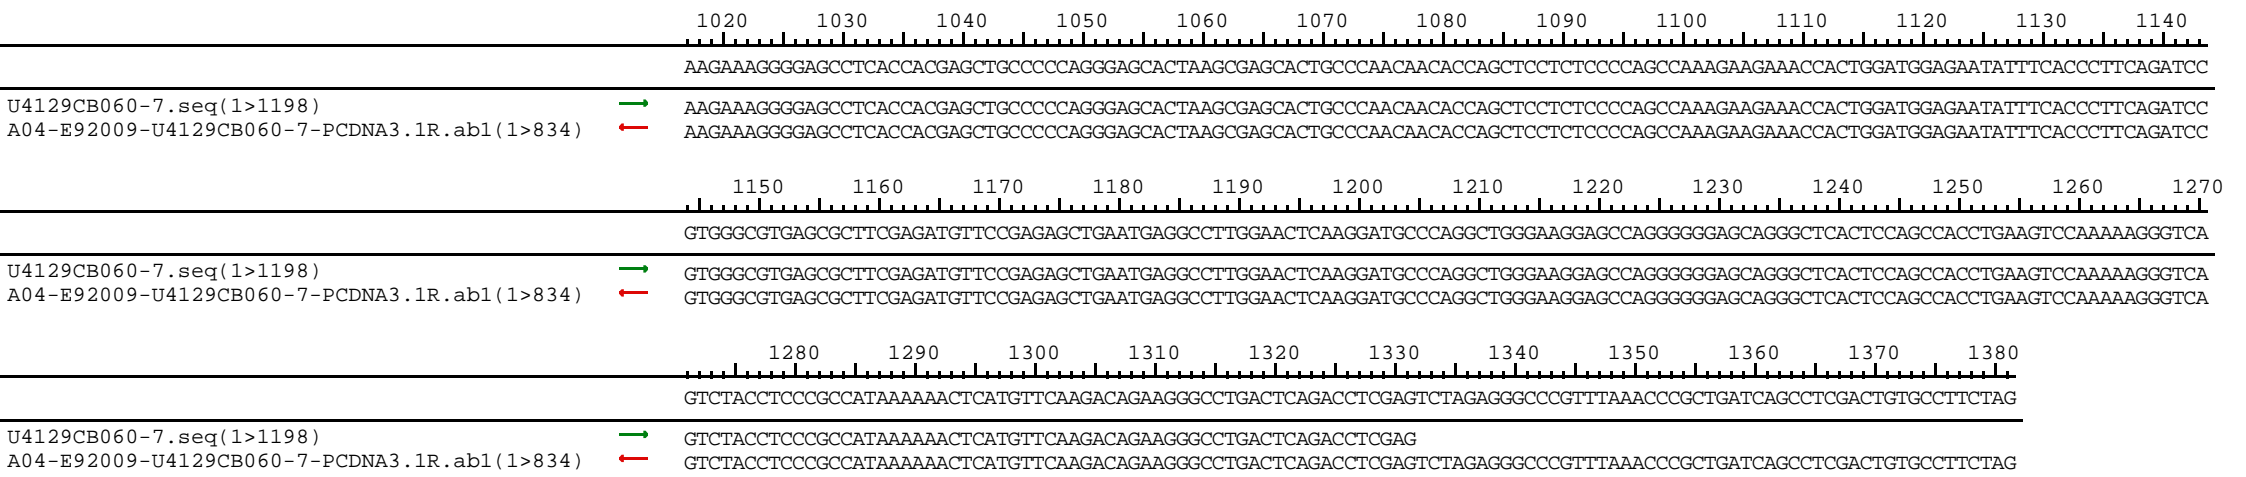

Supplement: s1 [file s1]

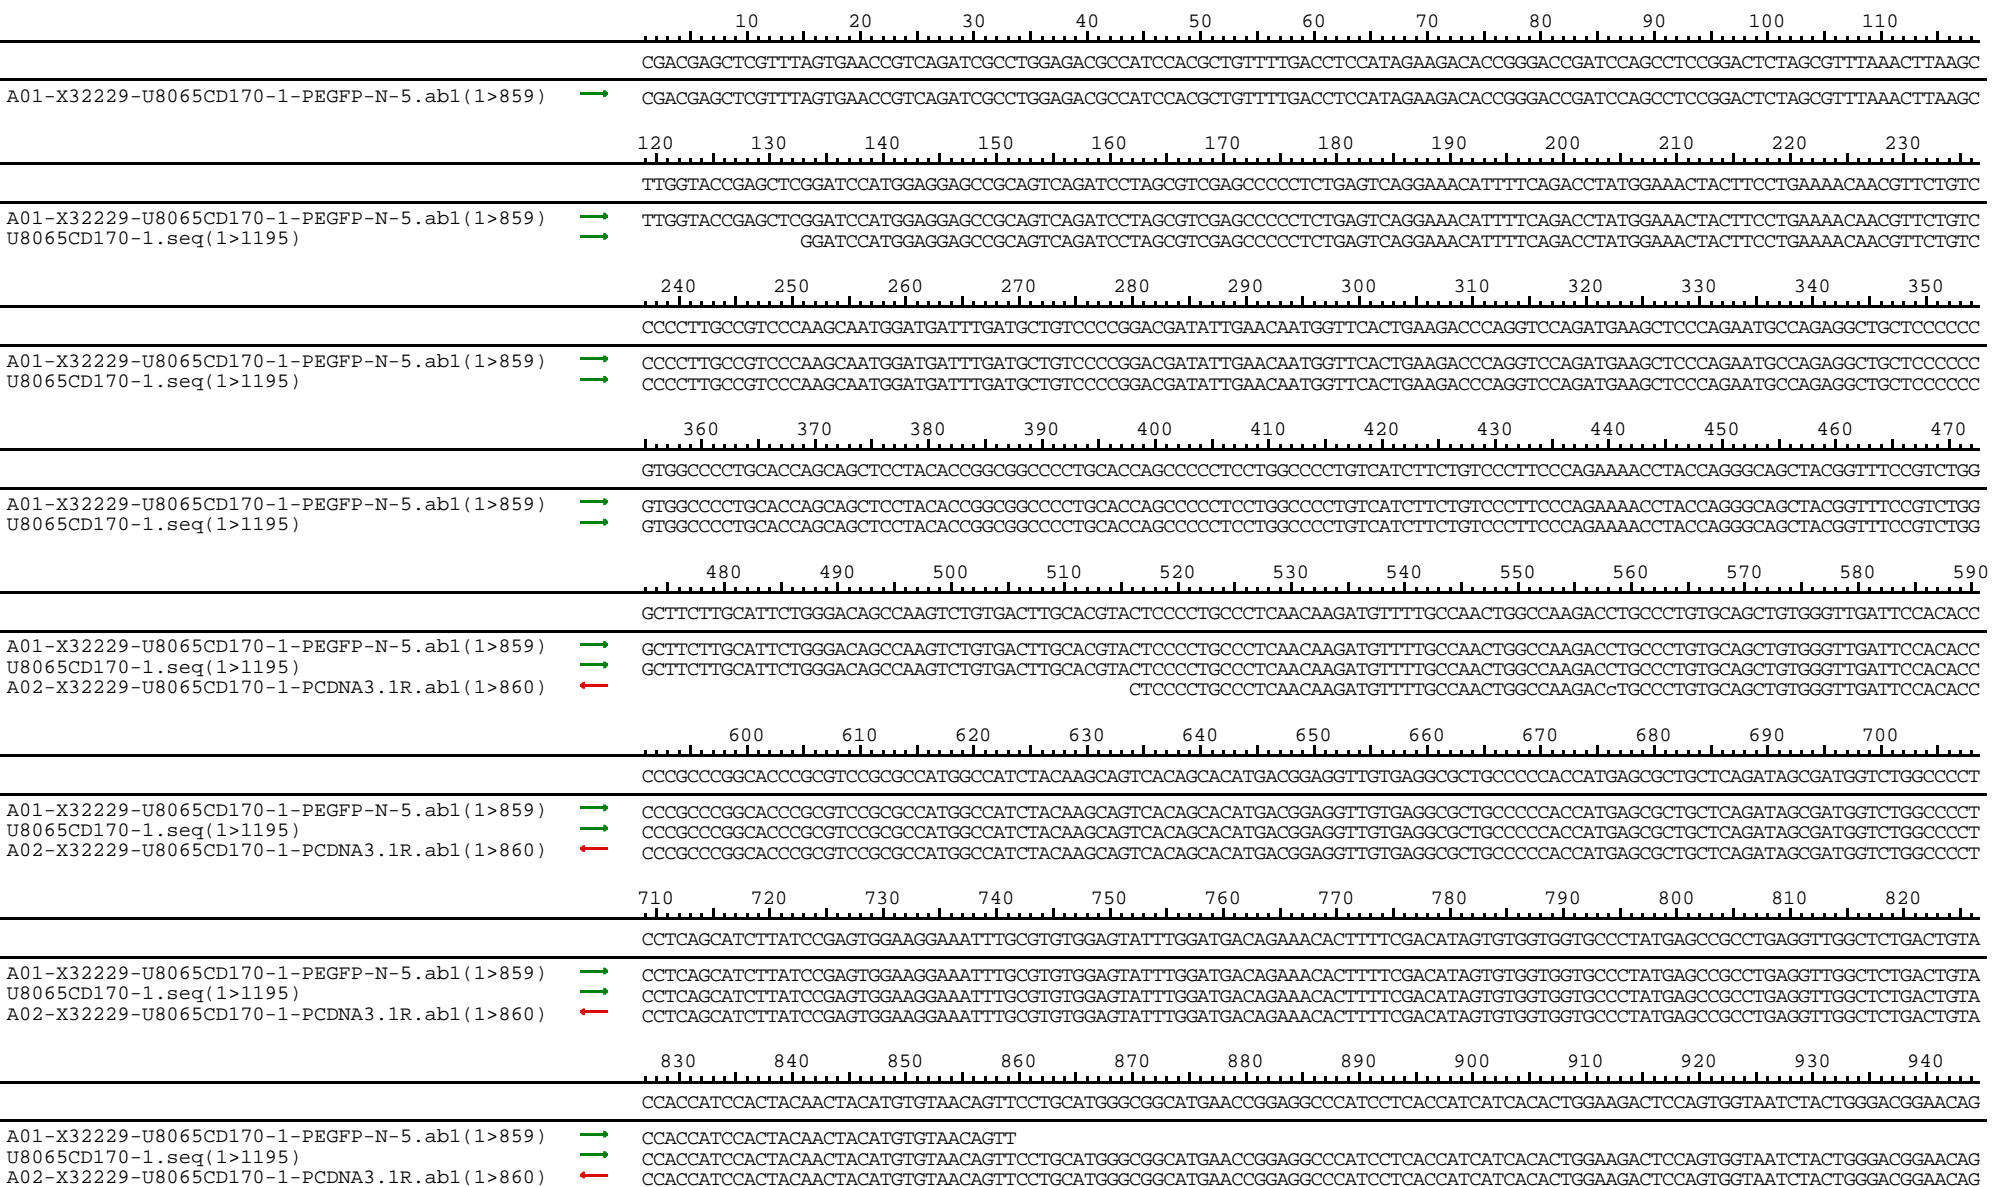

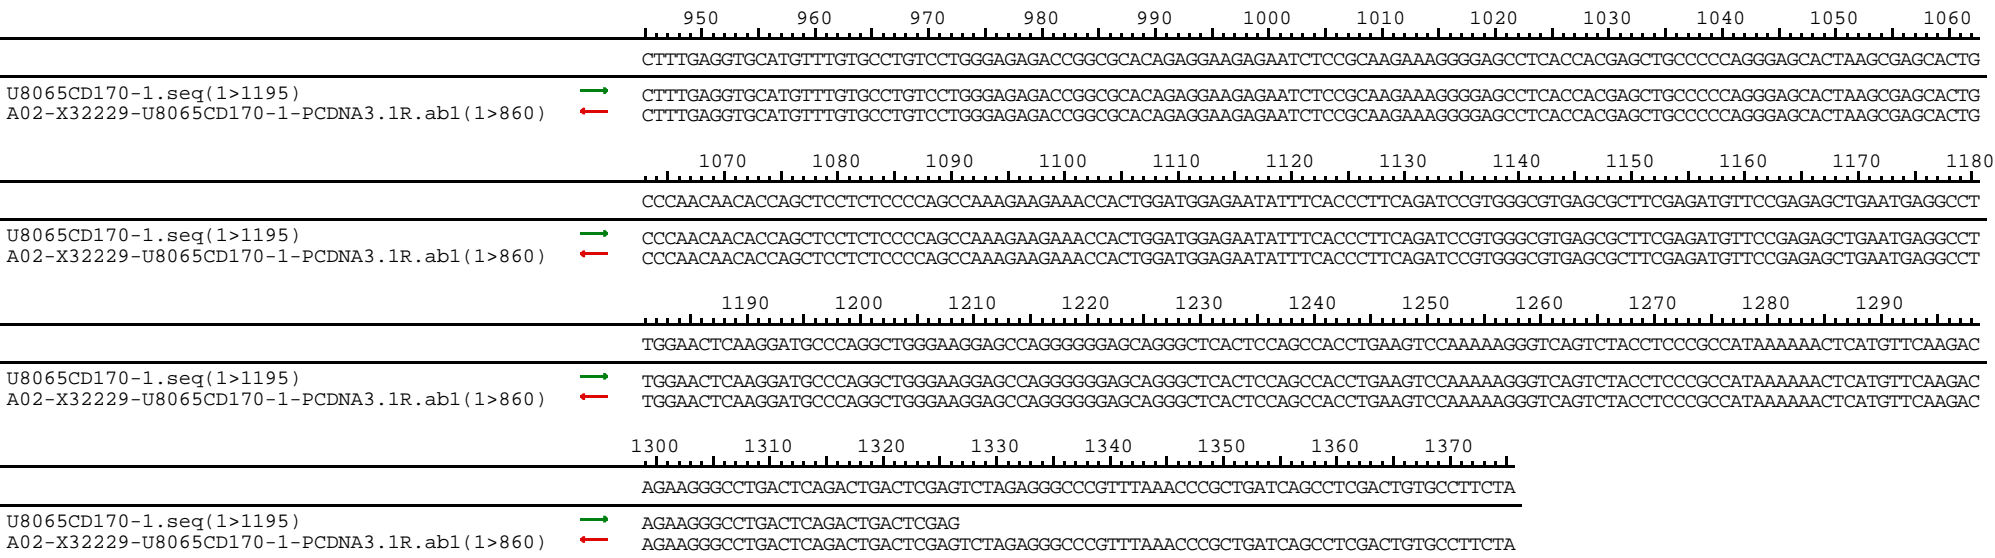

Supplement: s1 [file s1]

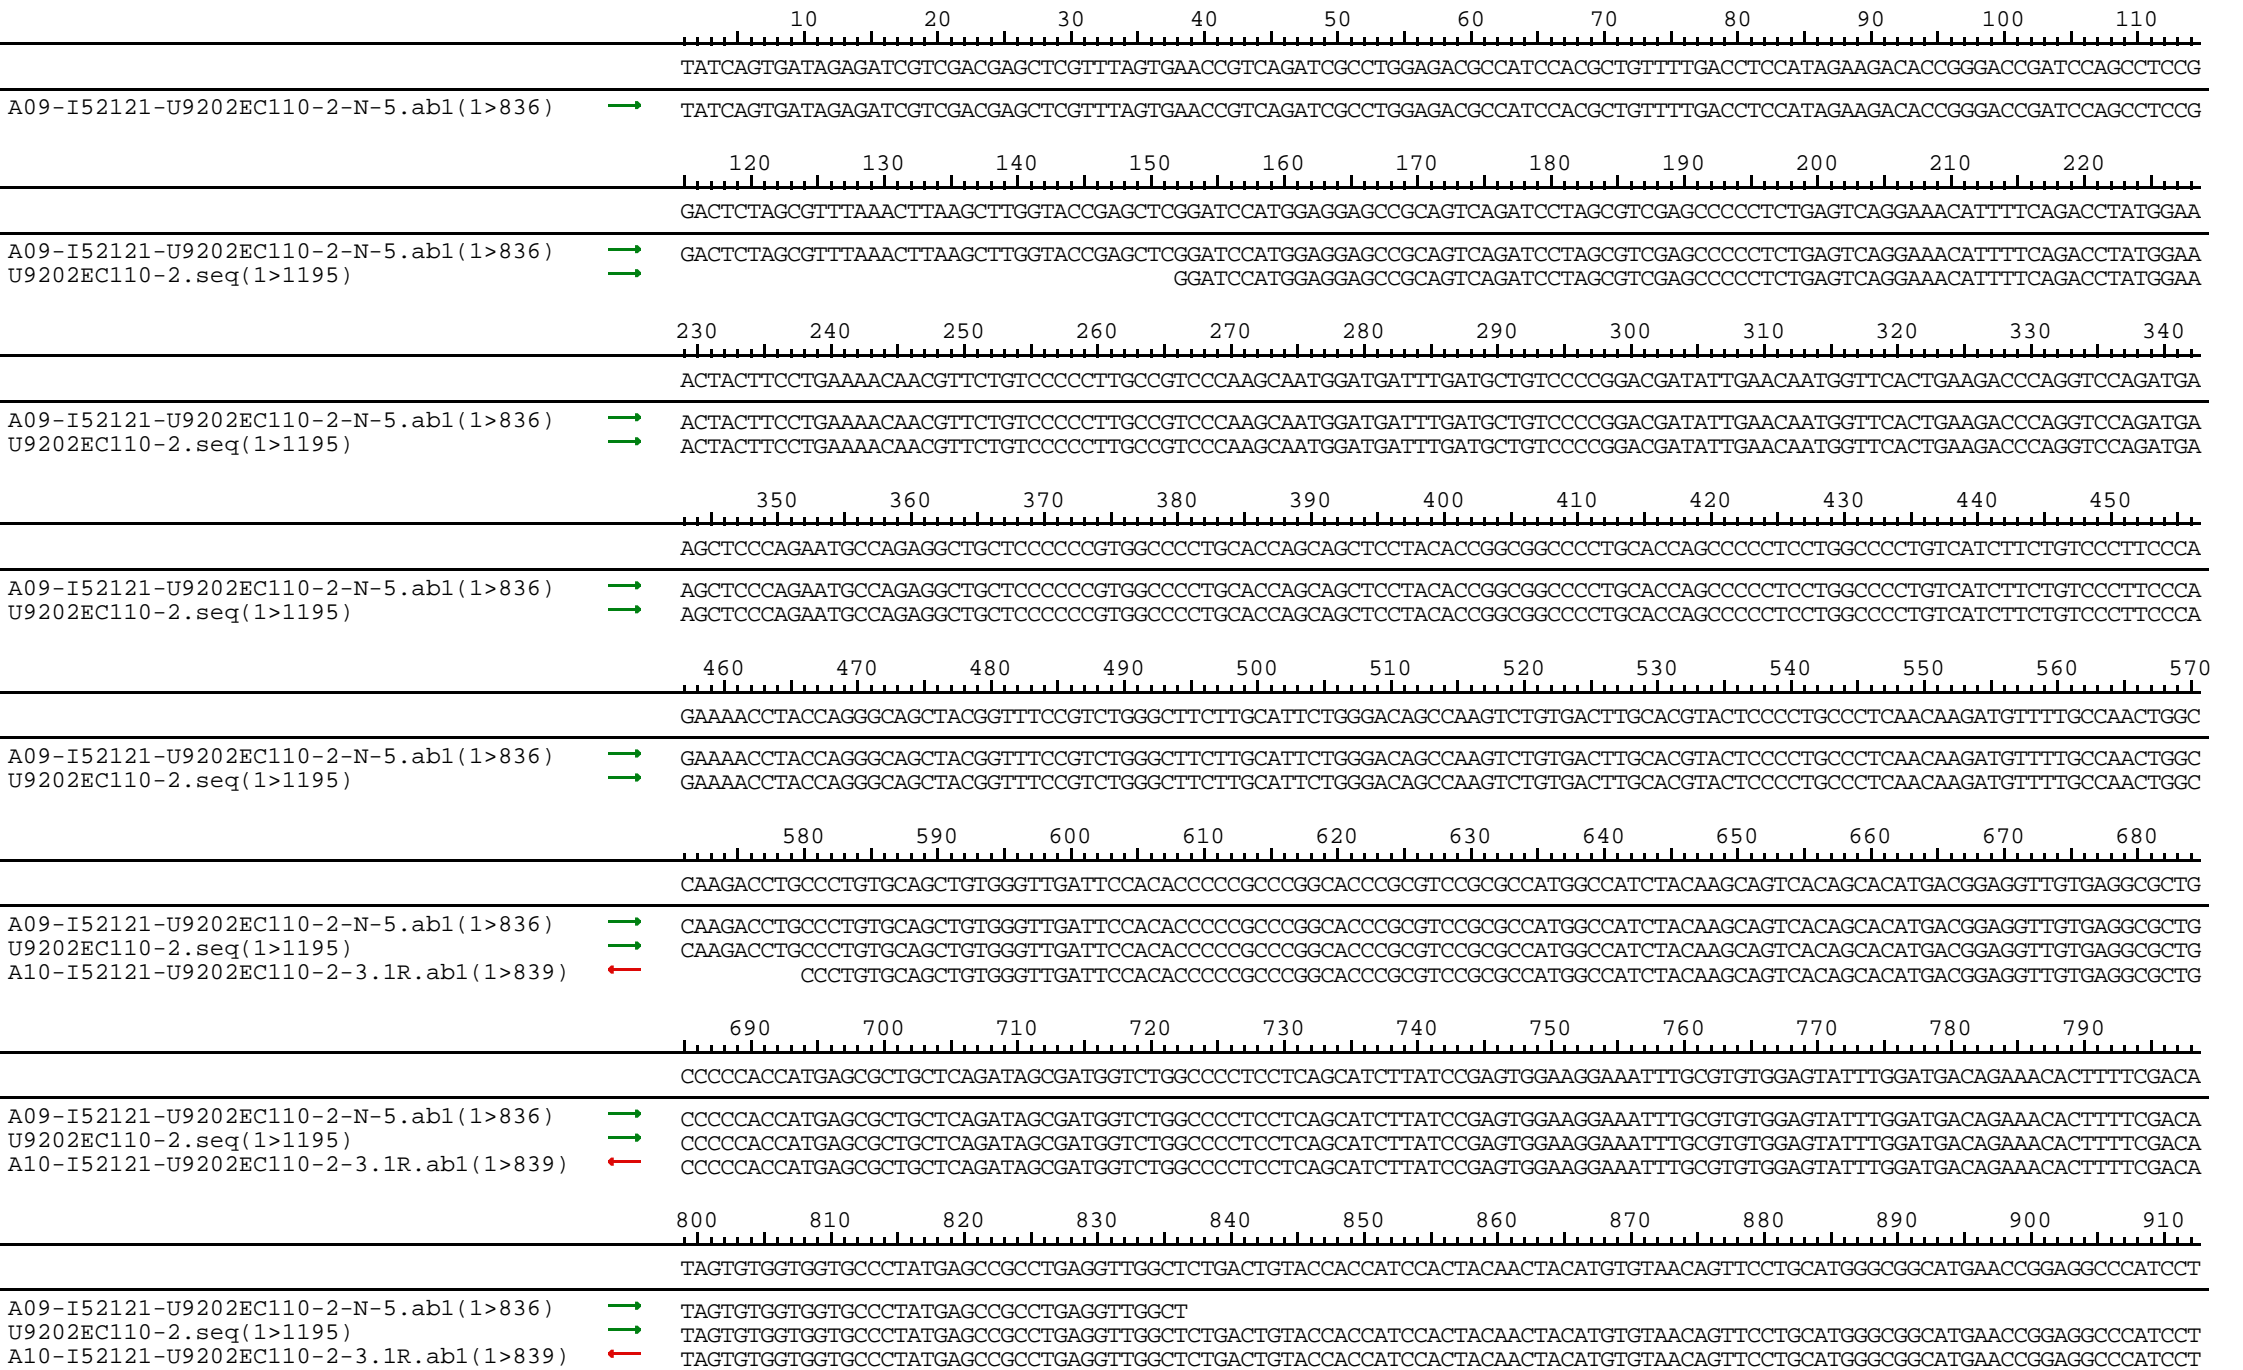

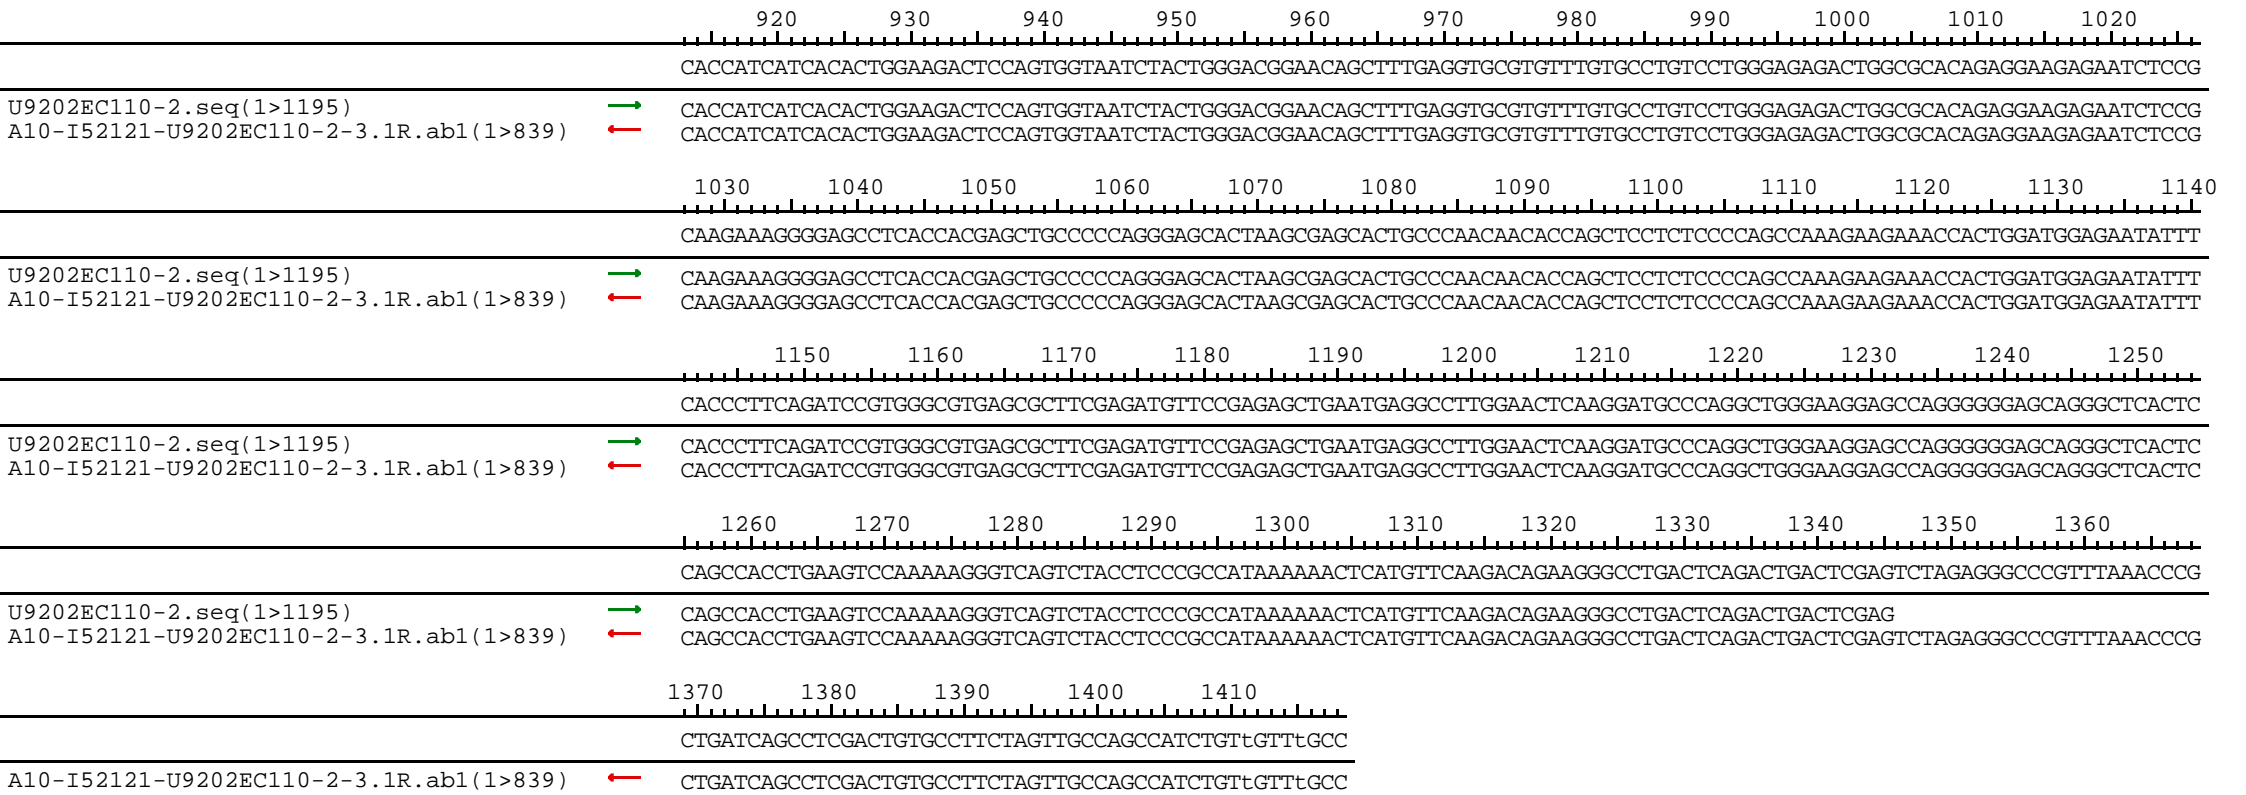

Supplement: s1 [file s1]

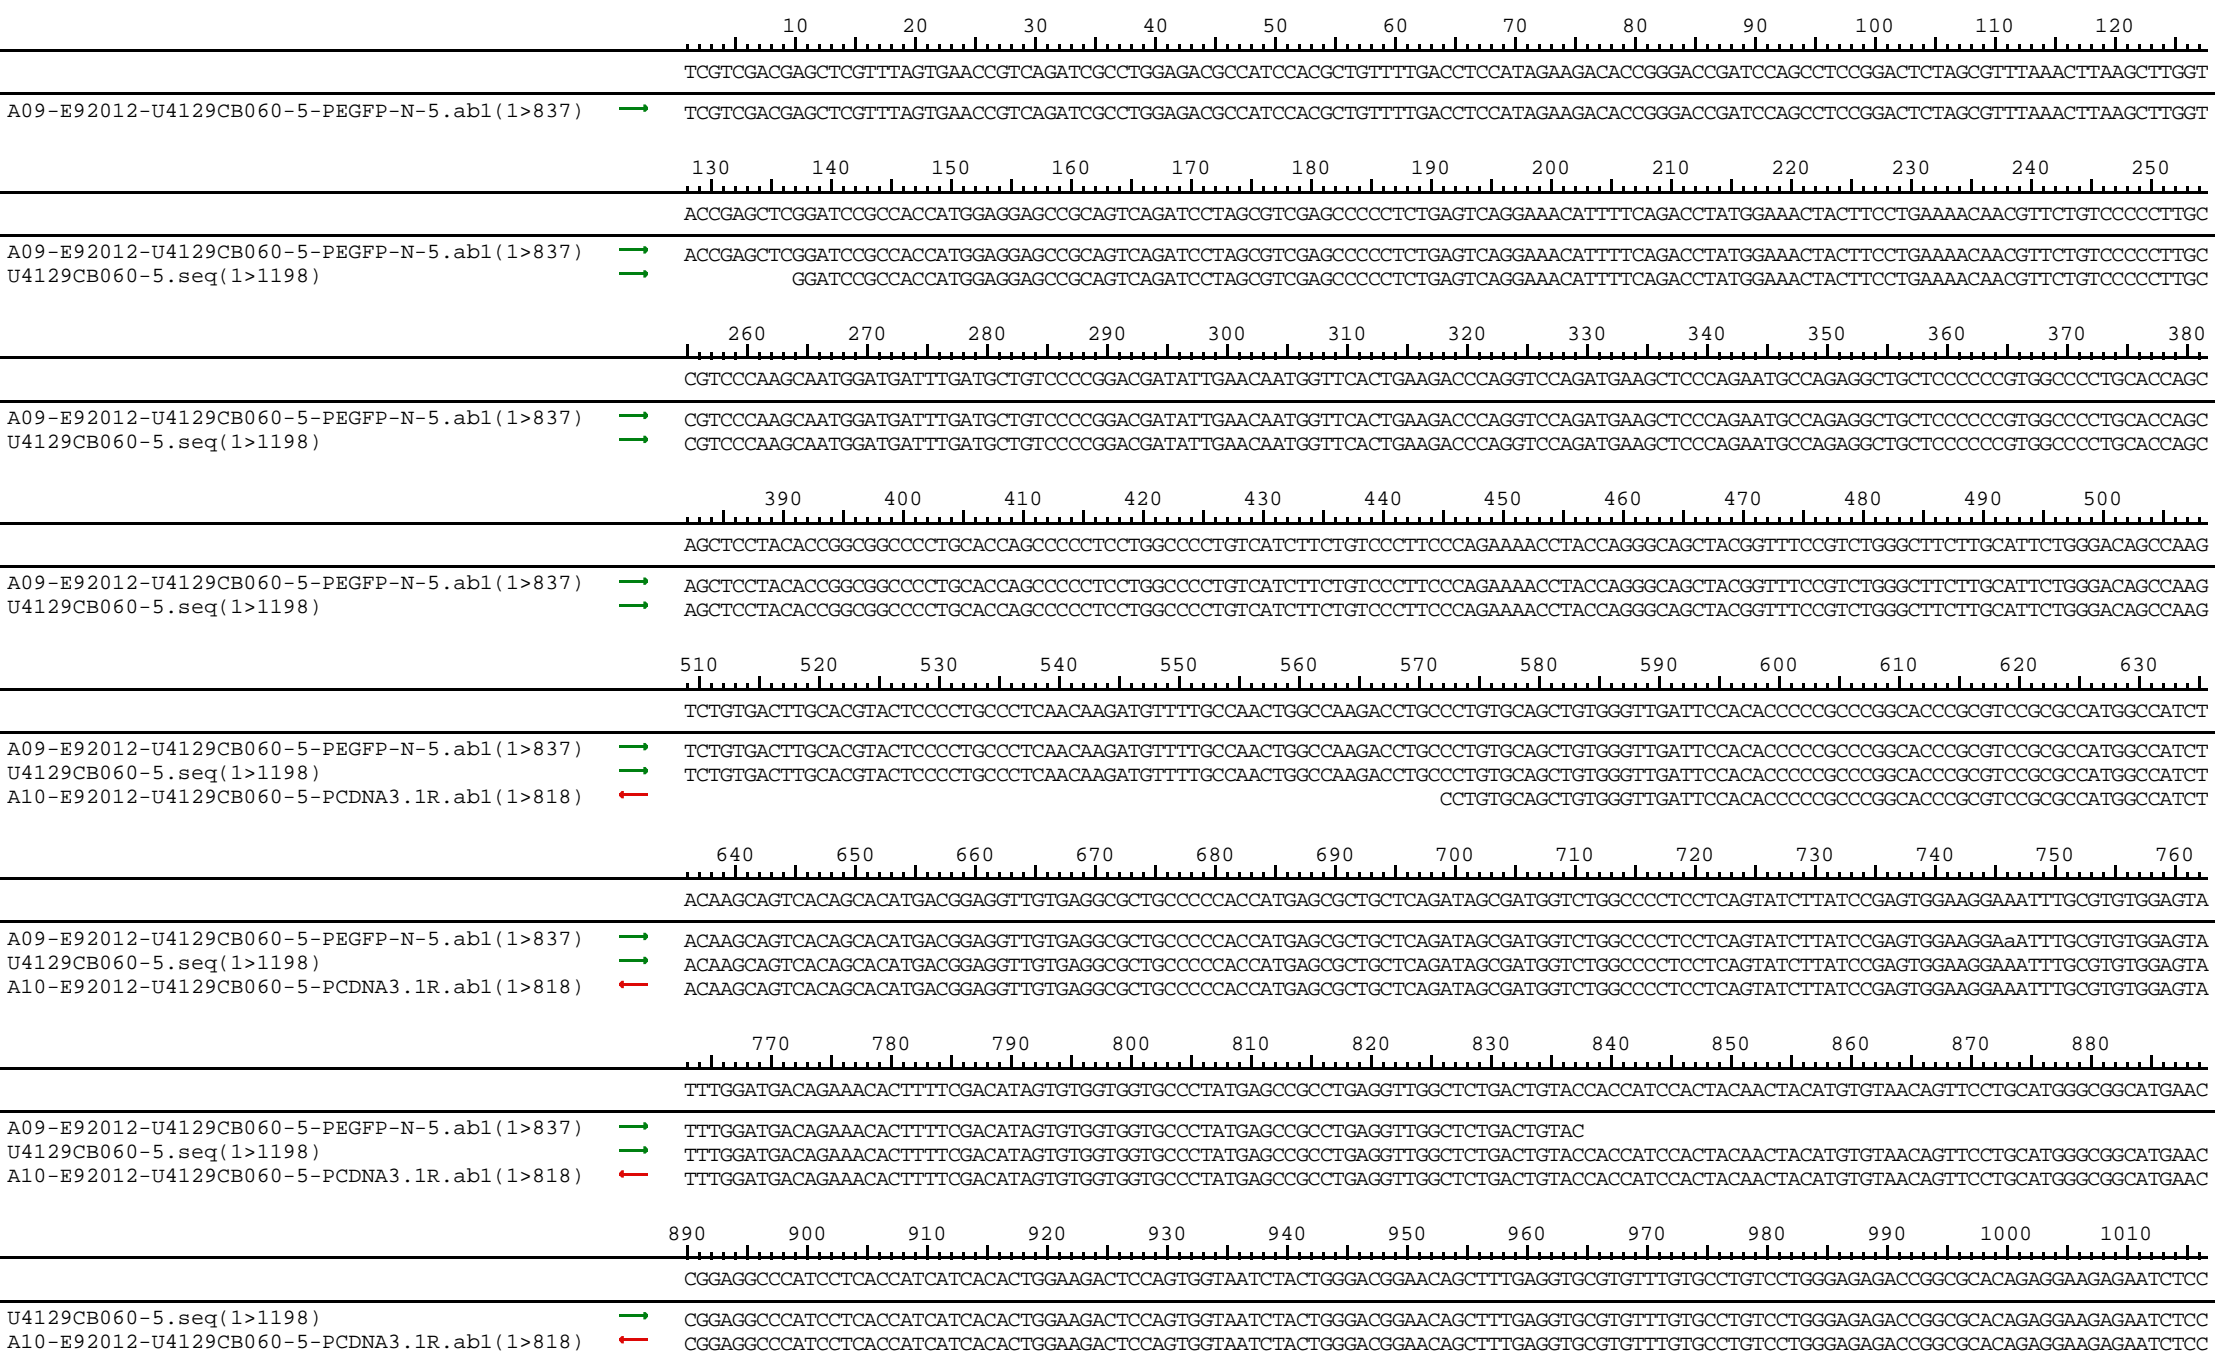

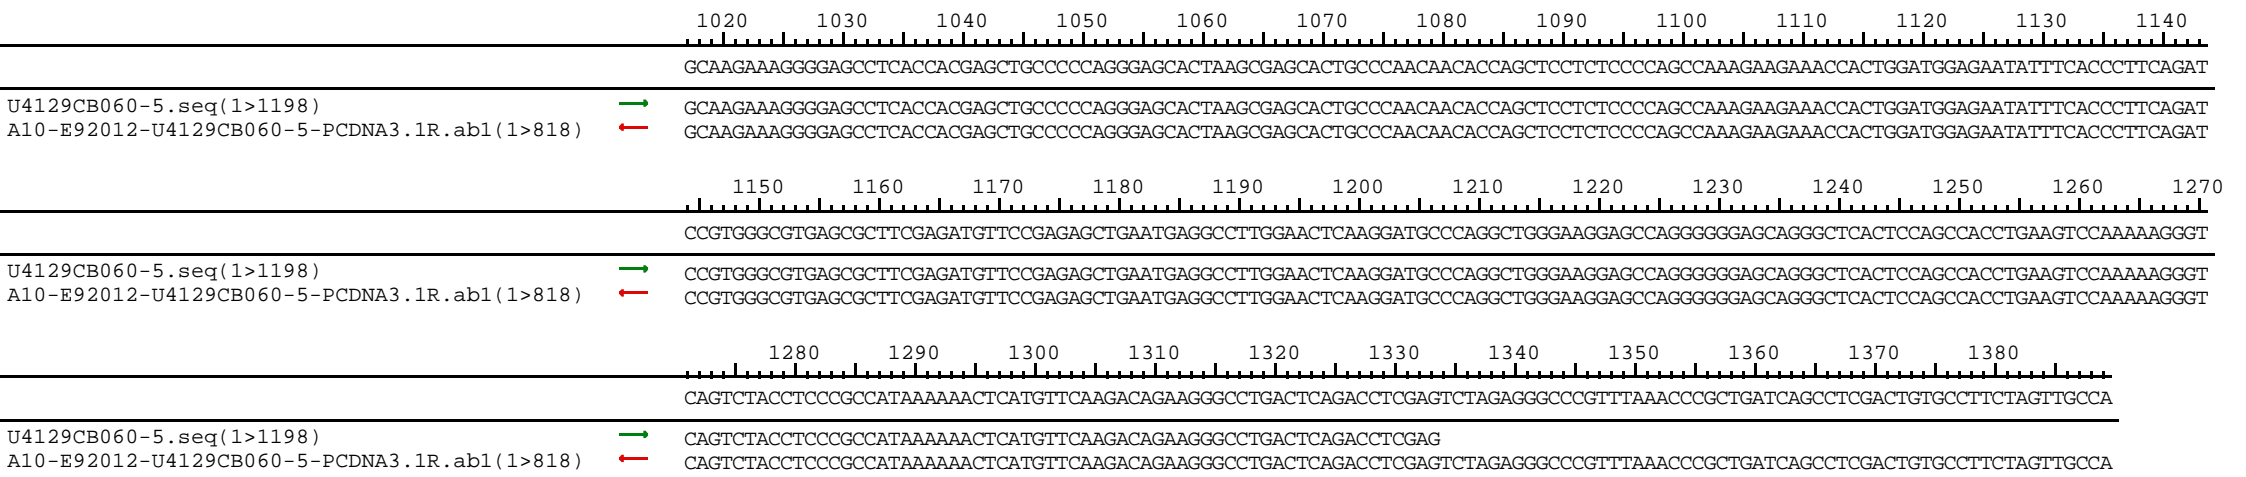

Supplement: s1 [file s1]

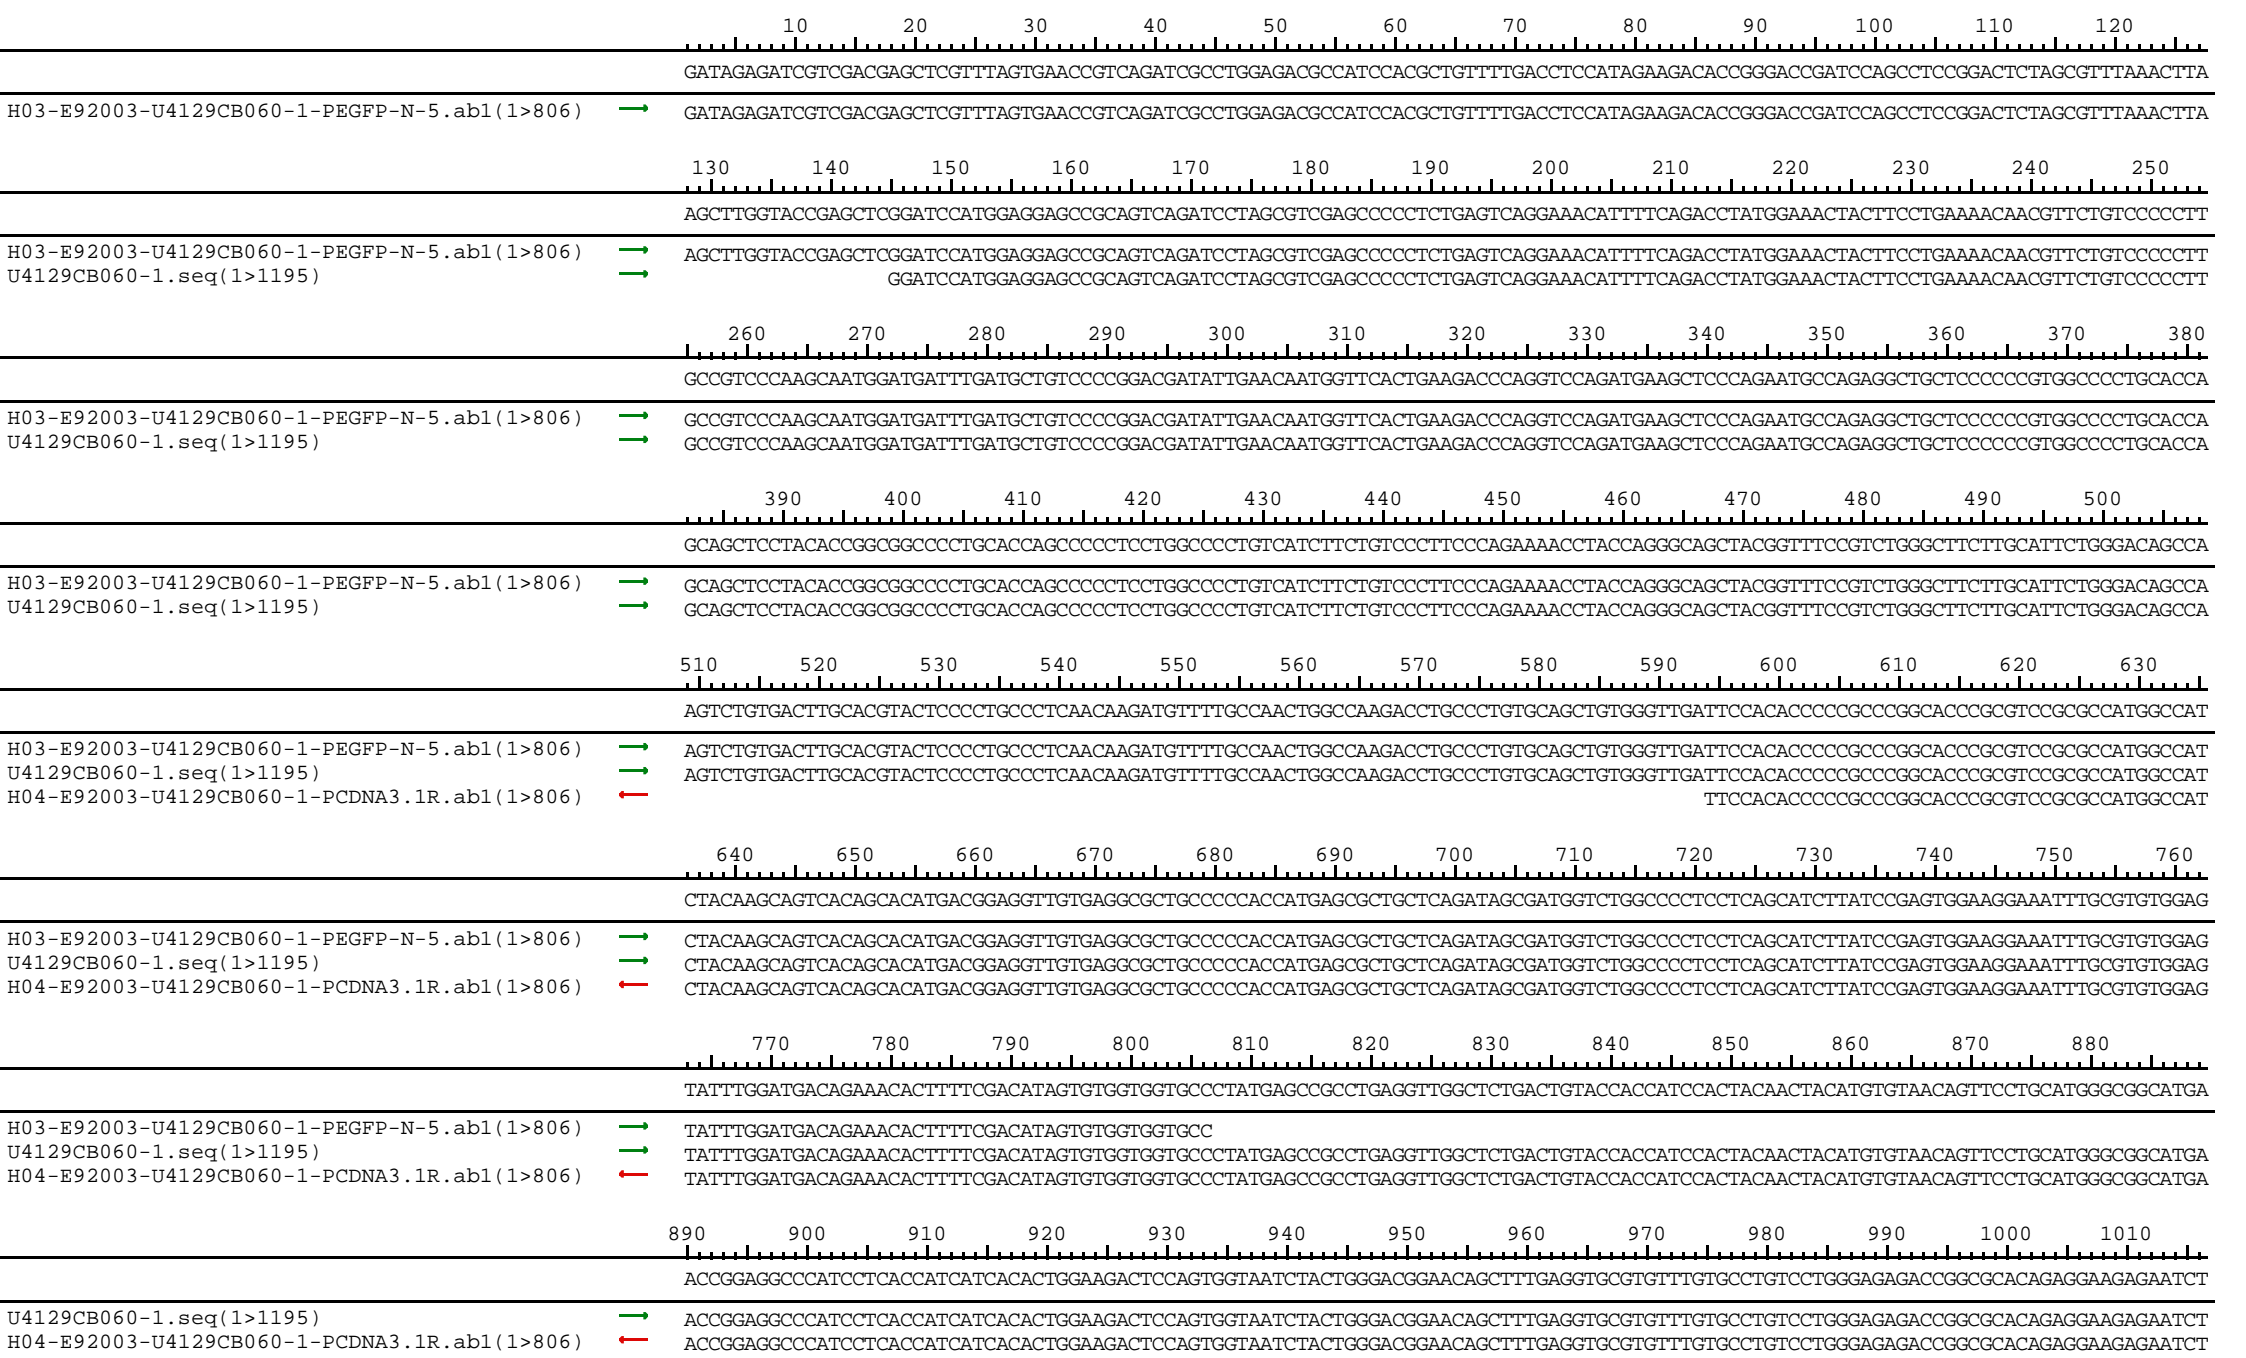

Project: U4129CB060-1.SQD Contig 1

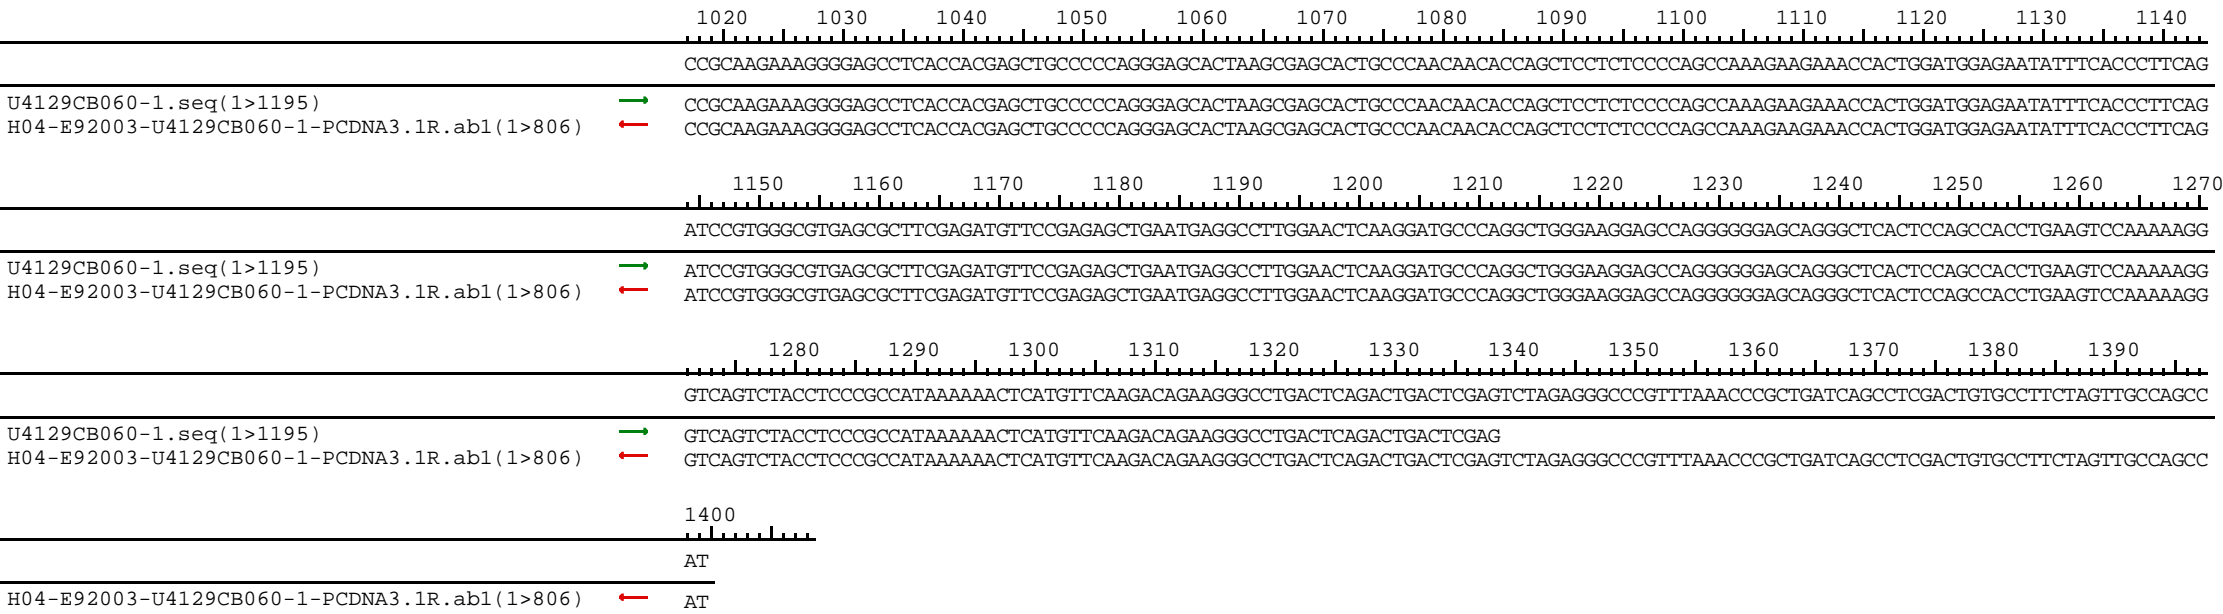

Supplement: s1 [file s1]

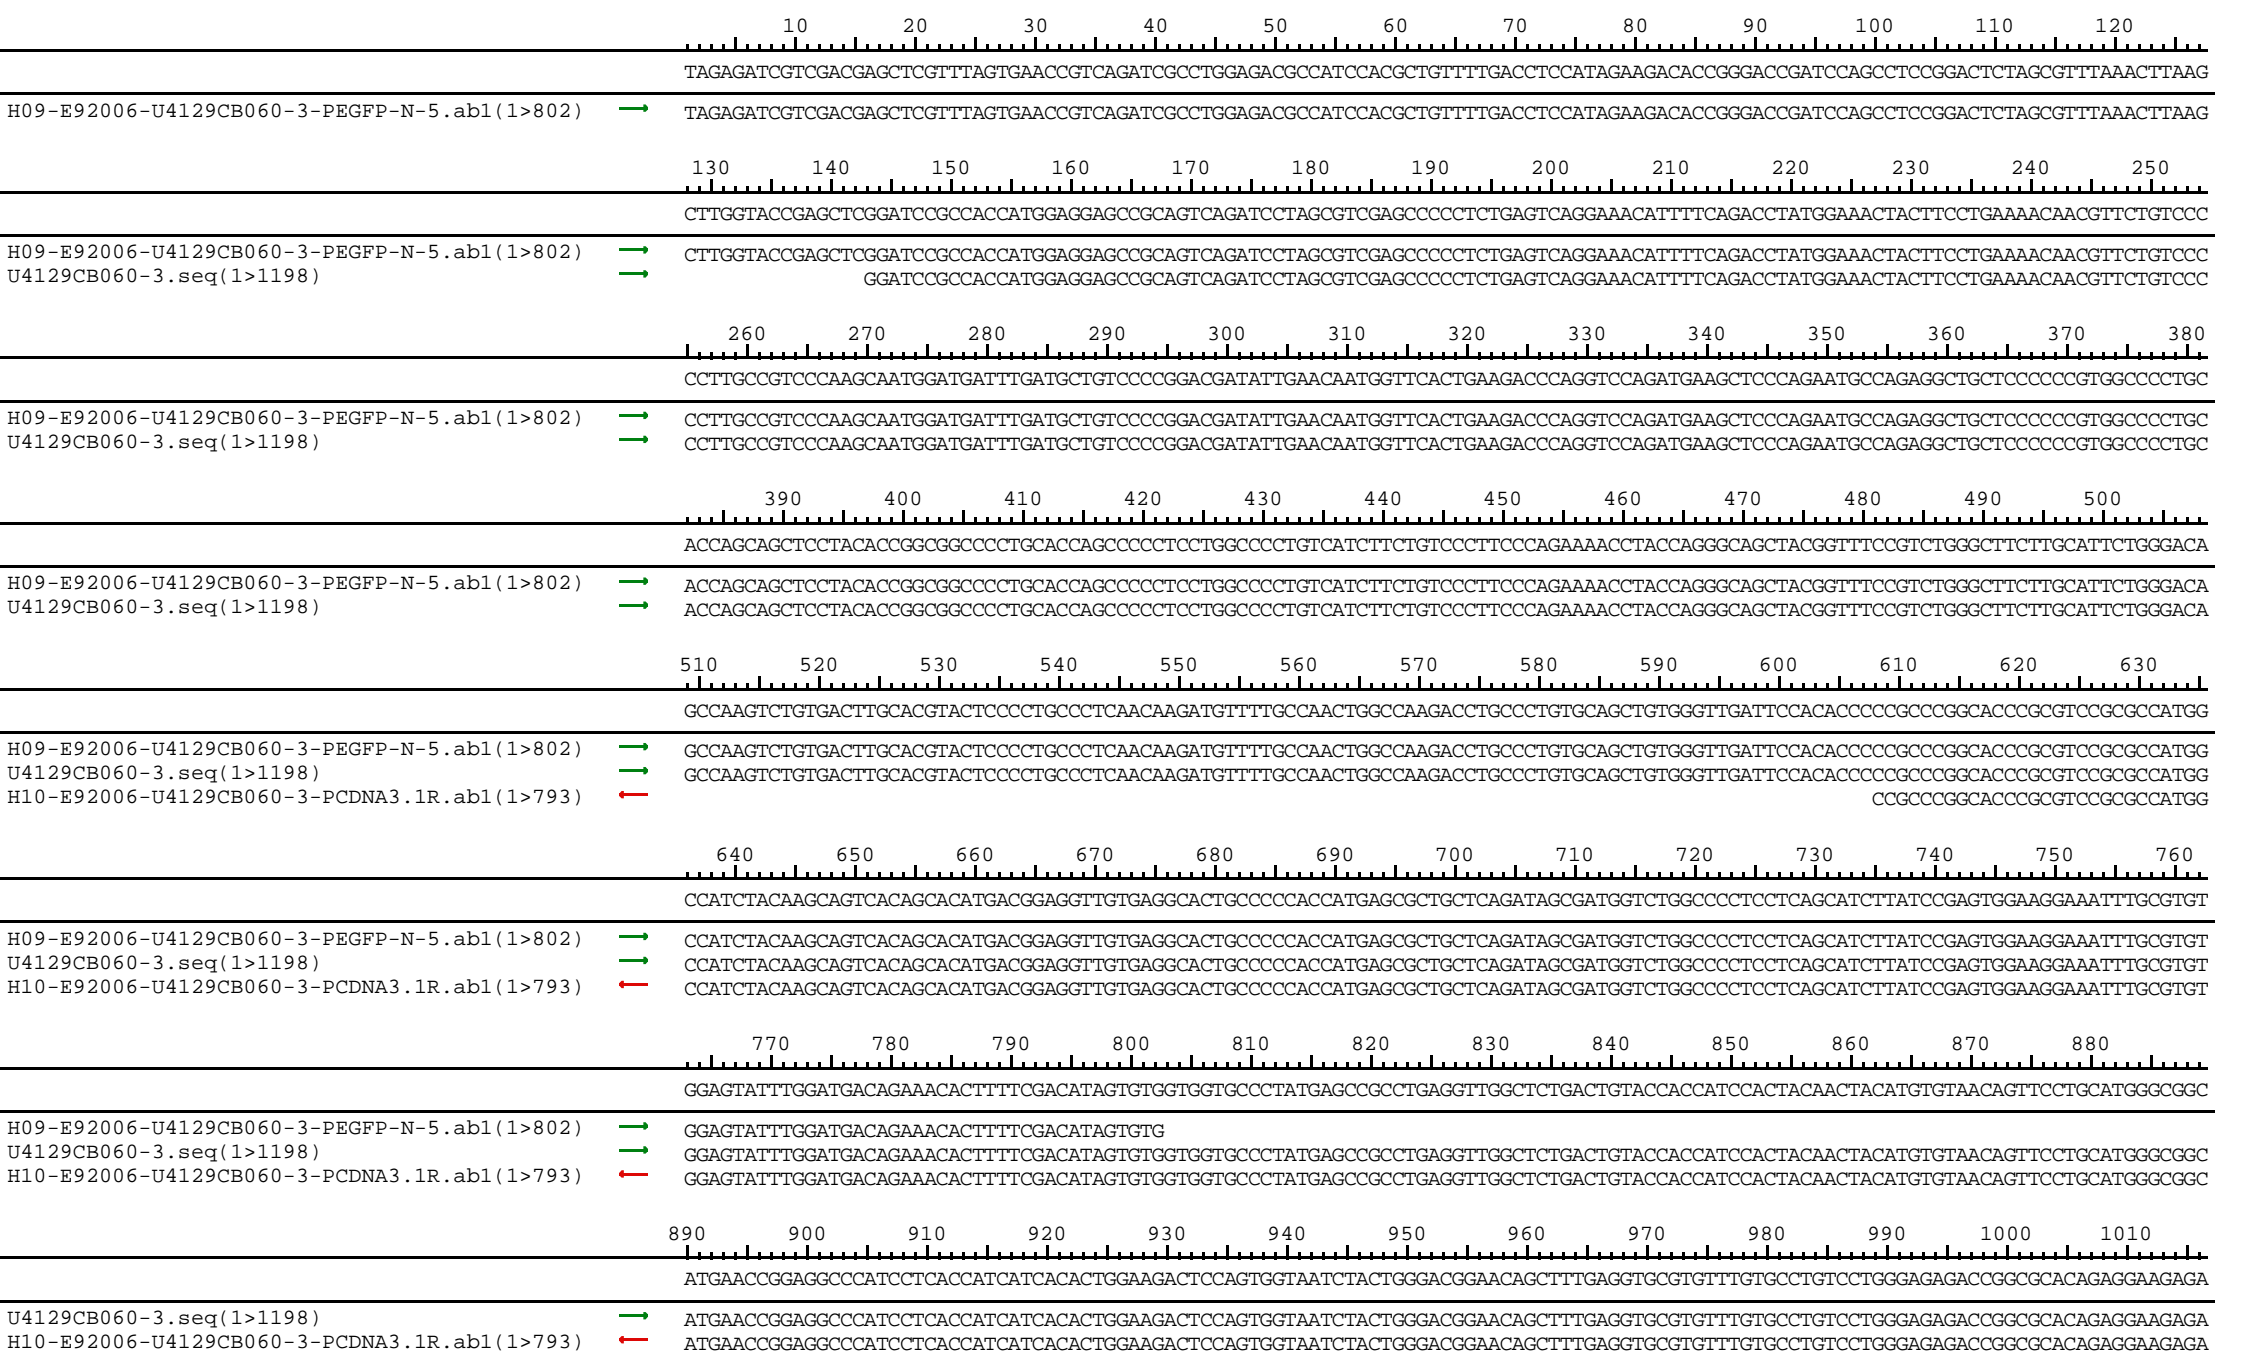

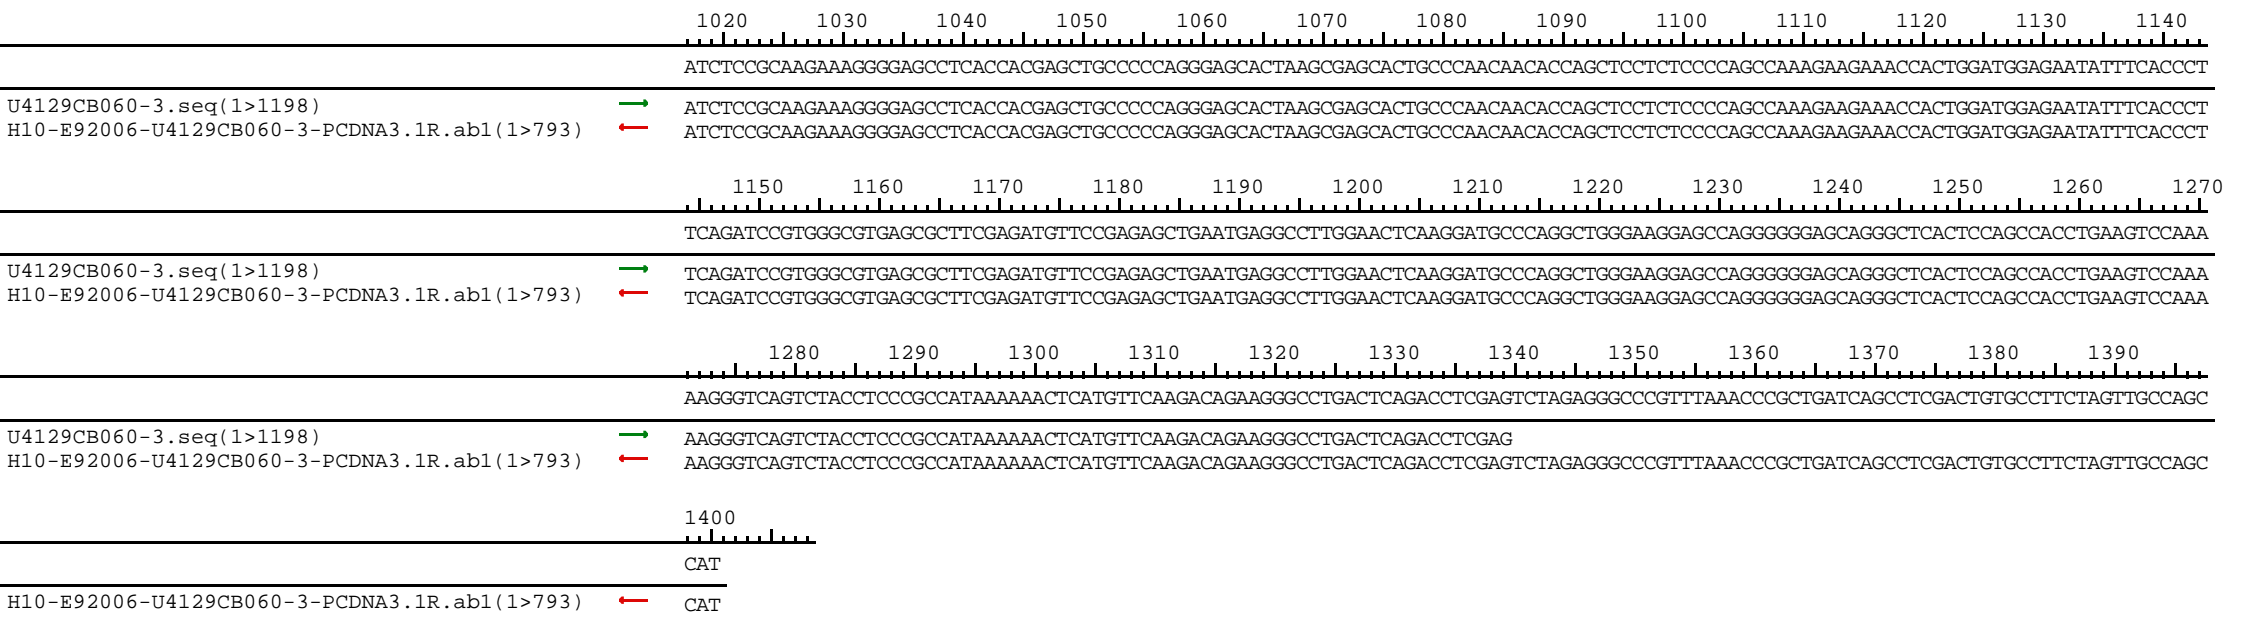

Supplement: s1 [file s1]

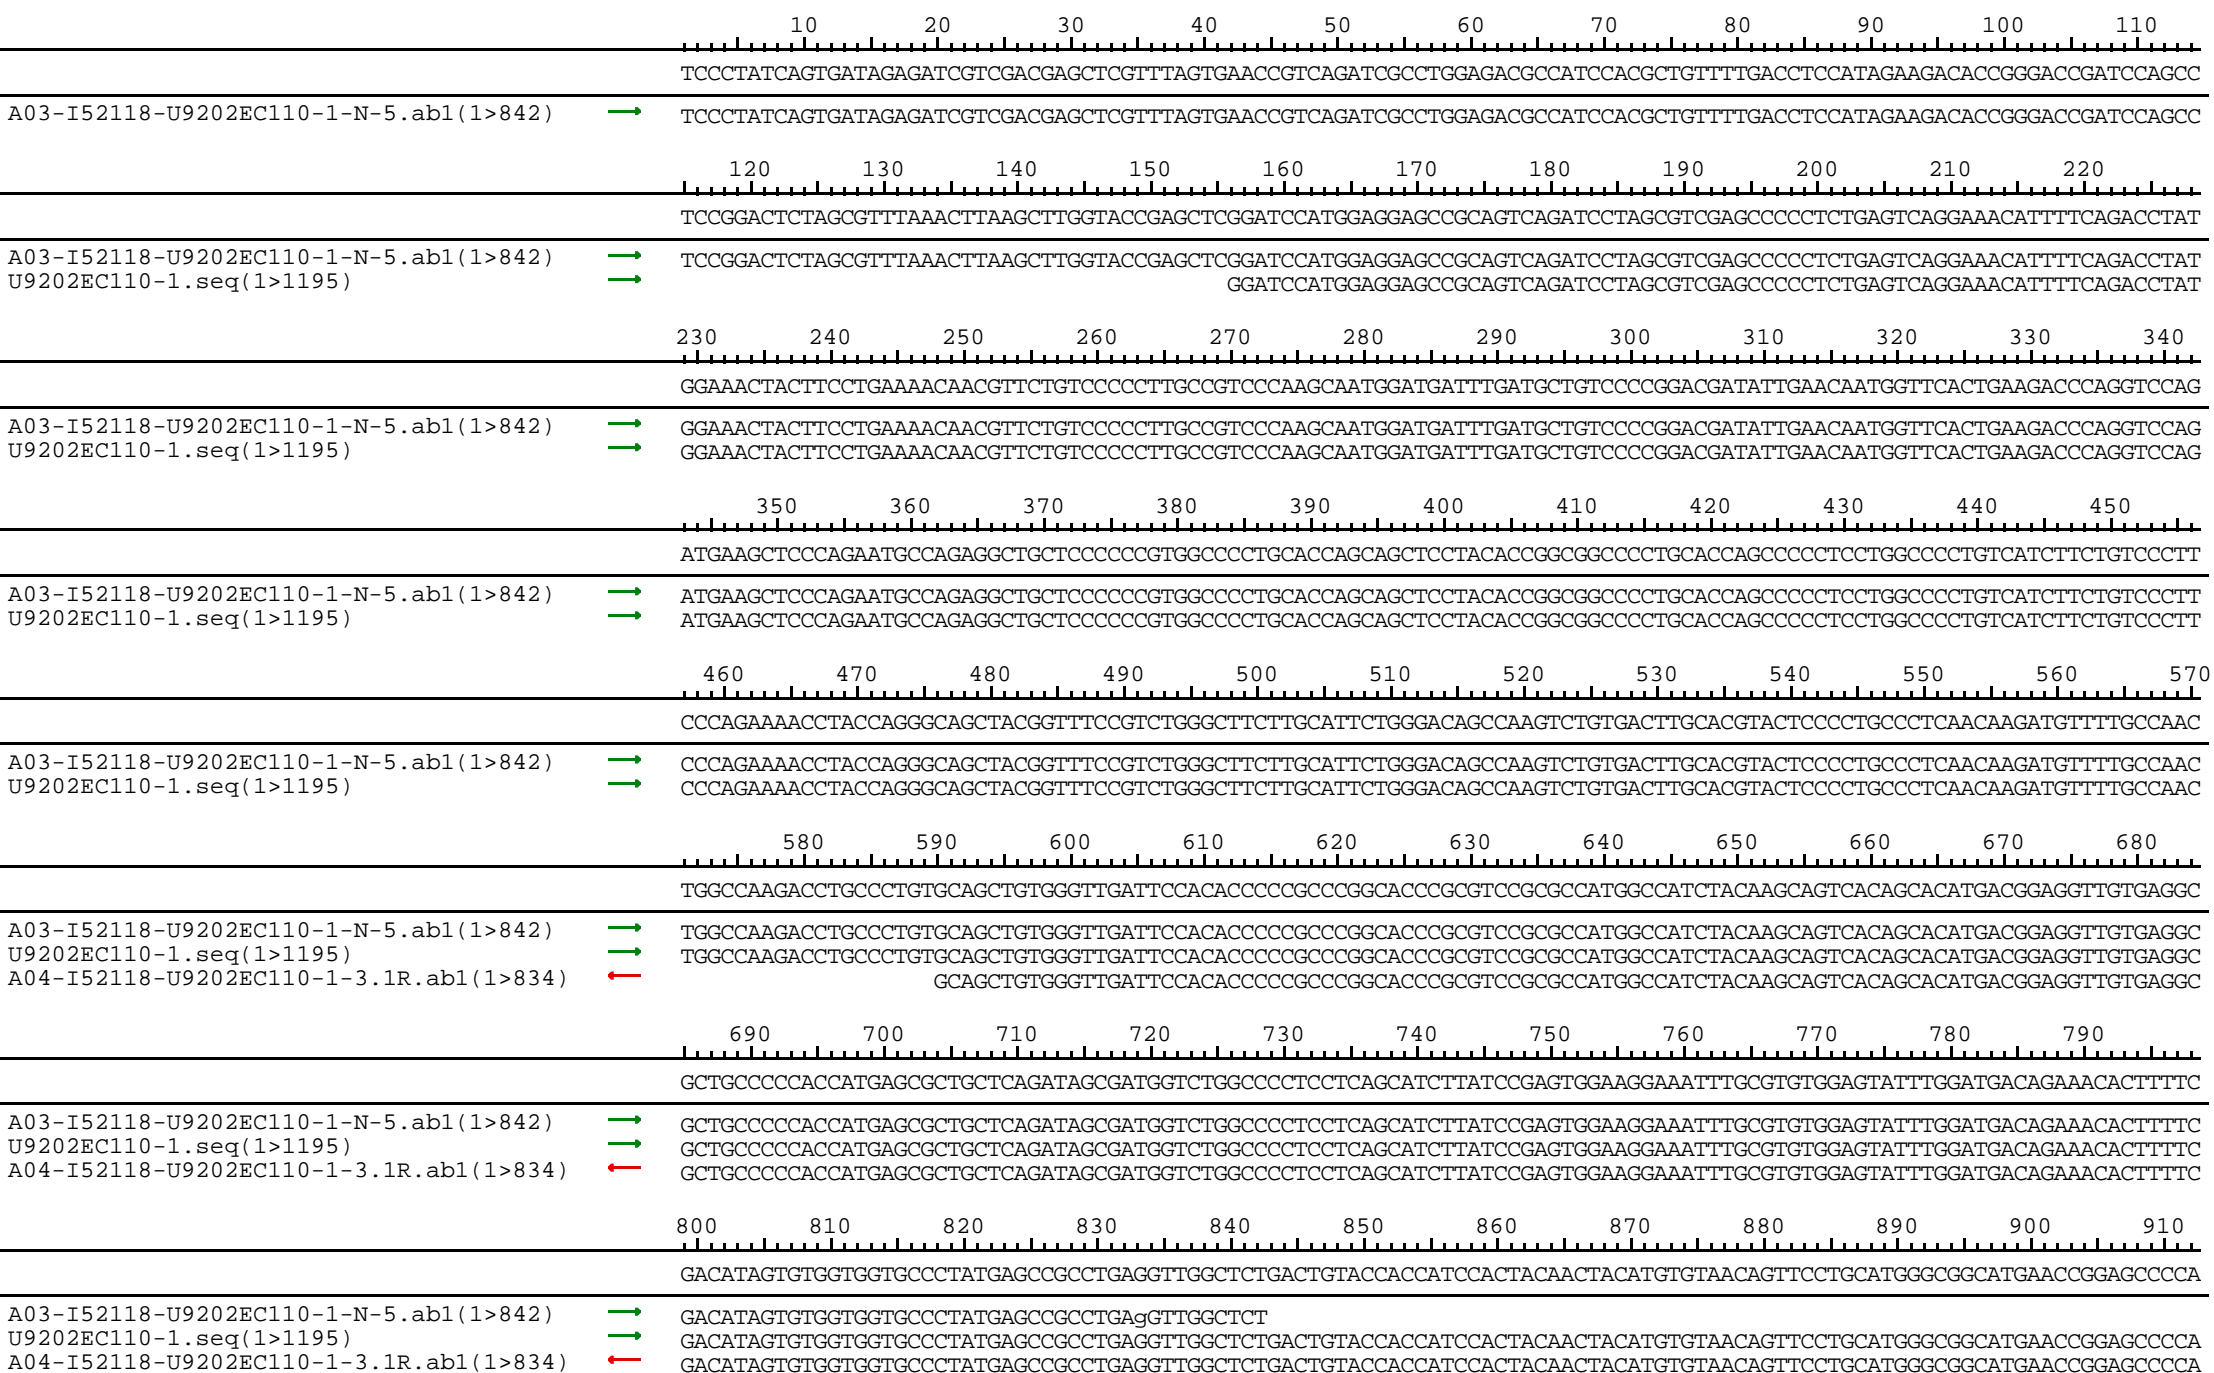

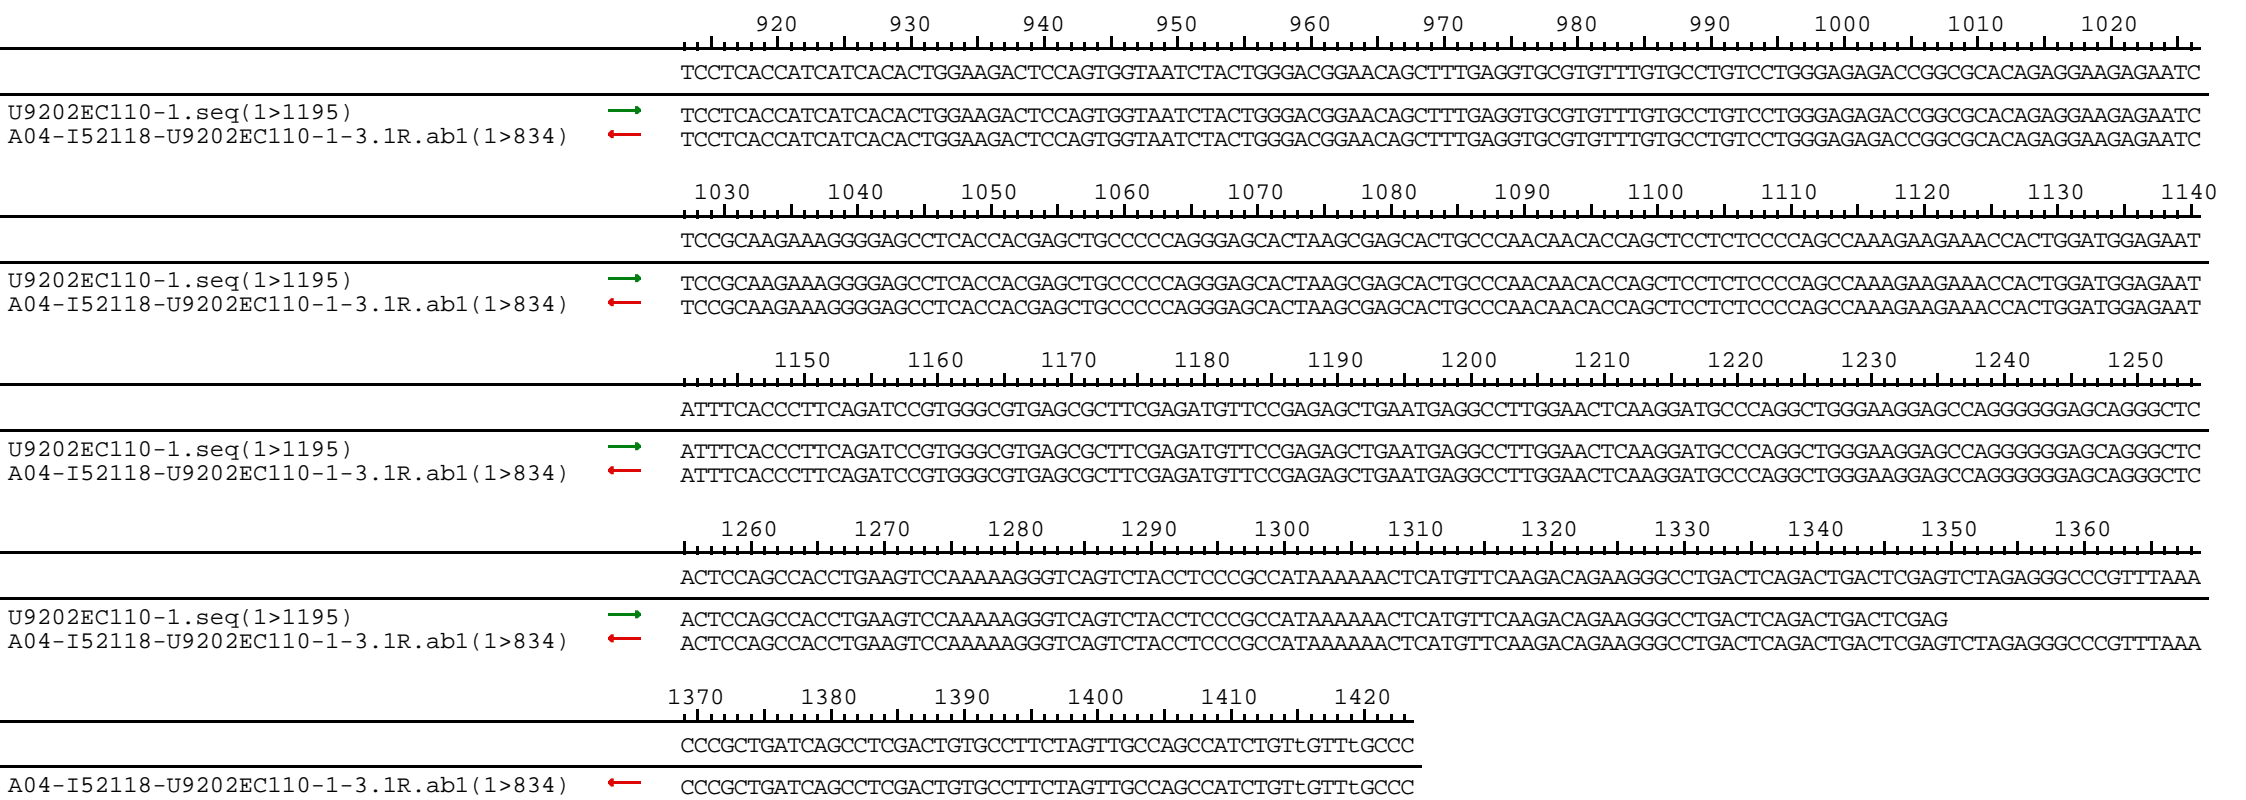

Supplement: s1 [file s1]

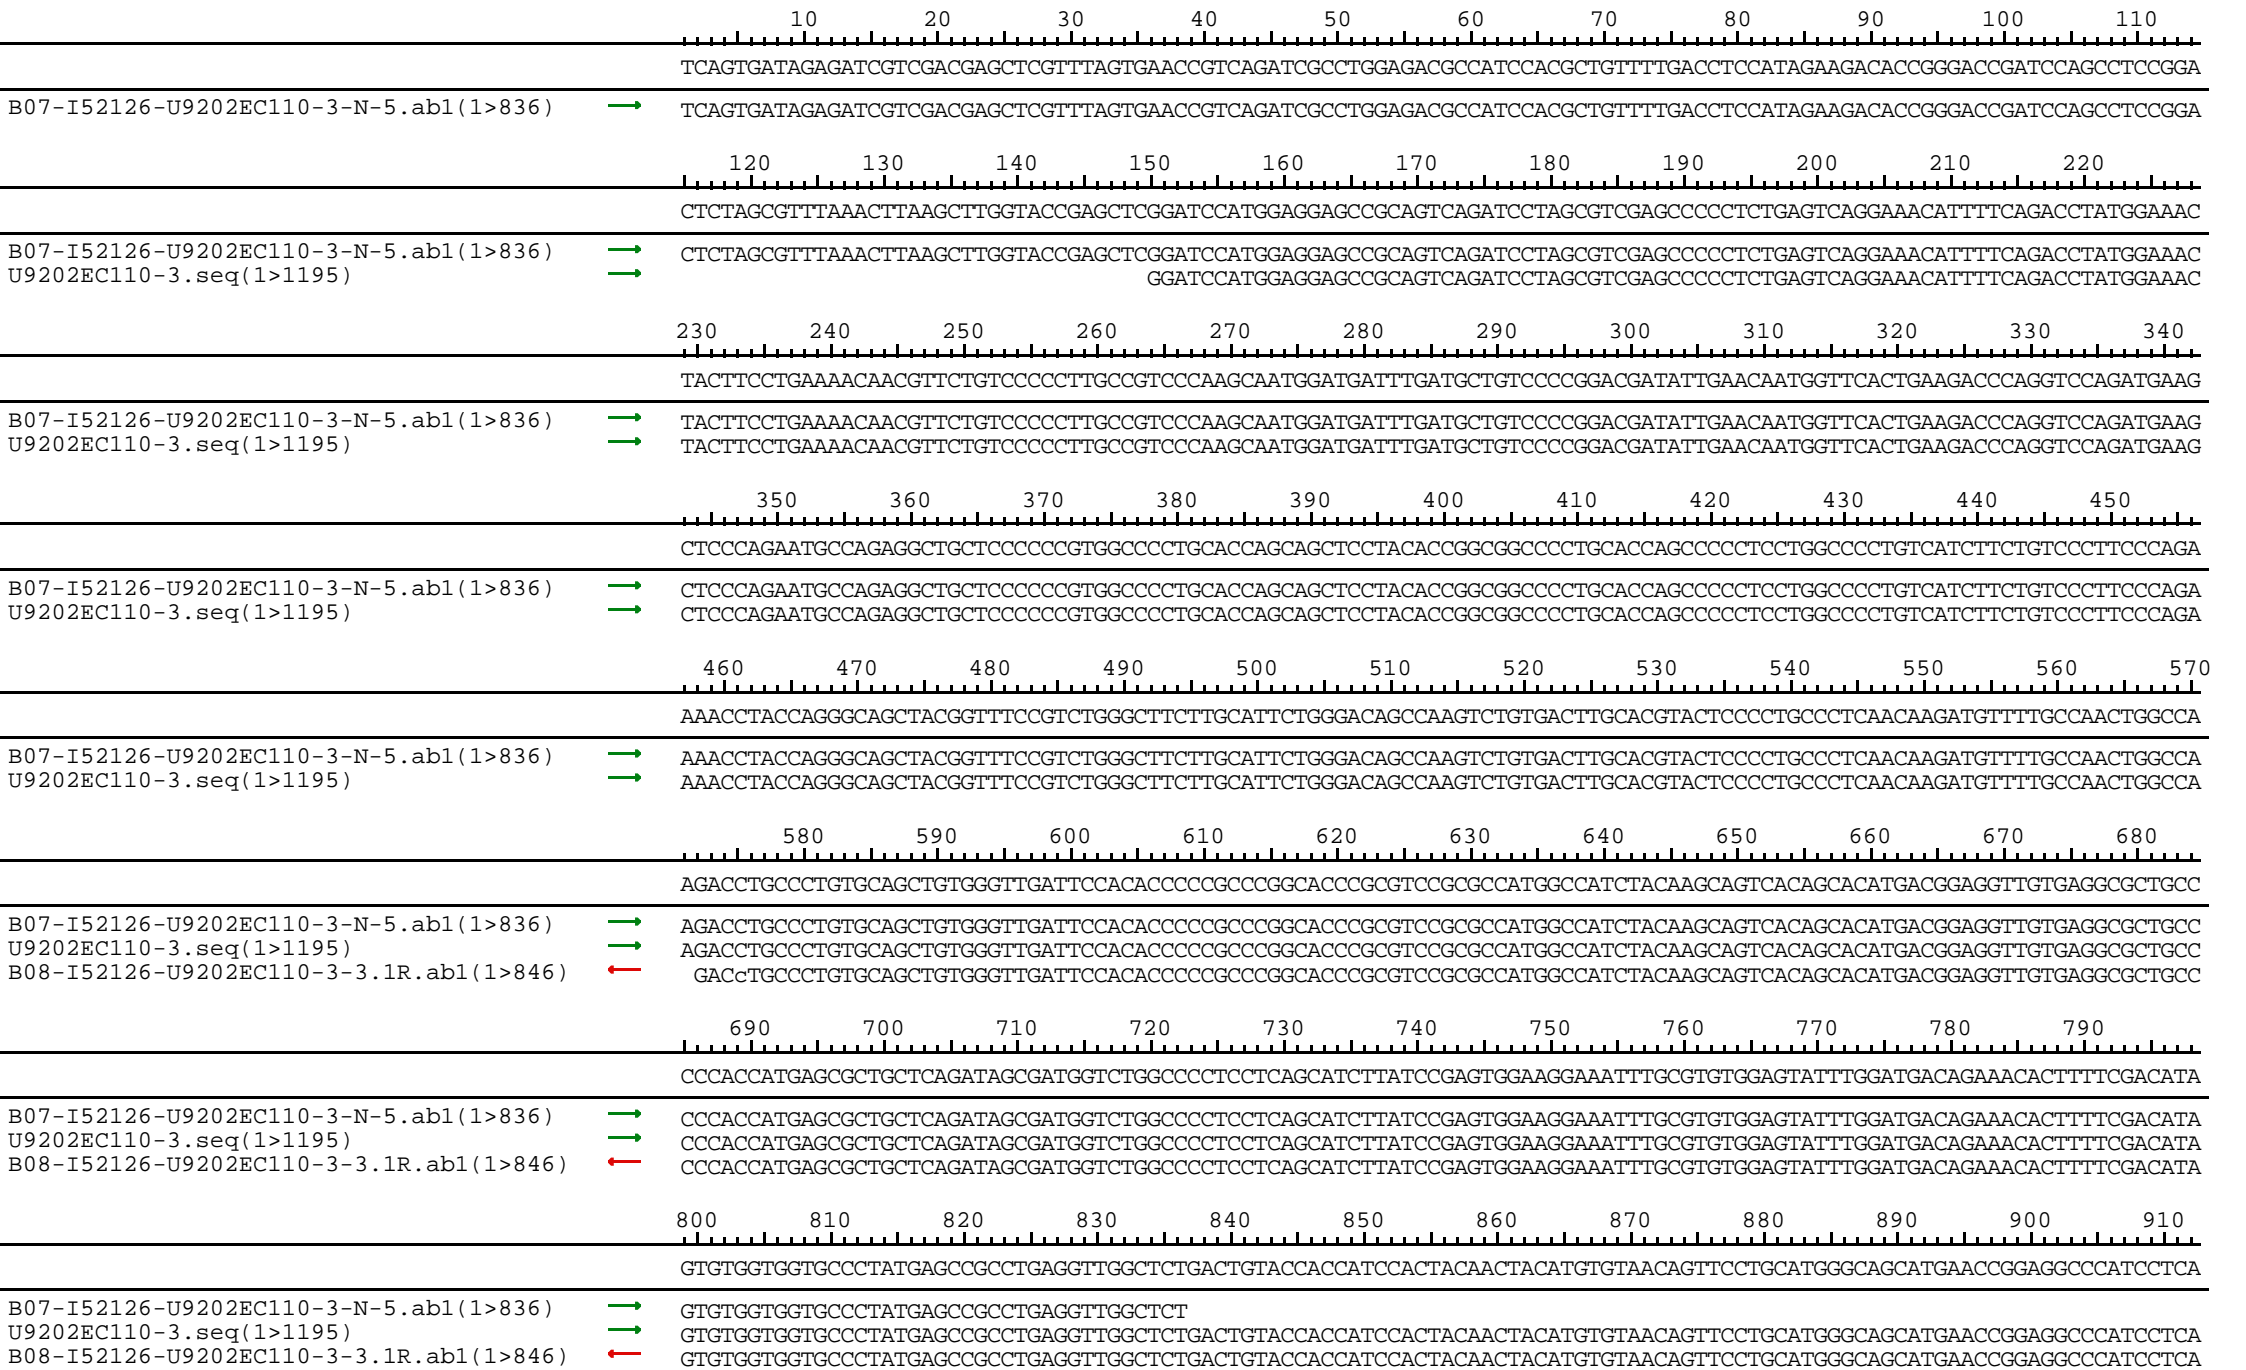

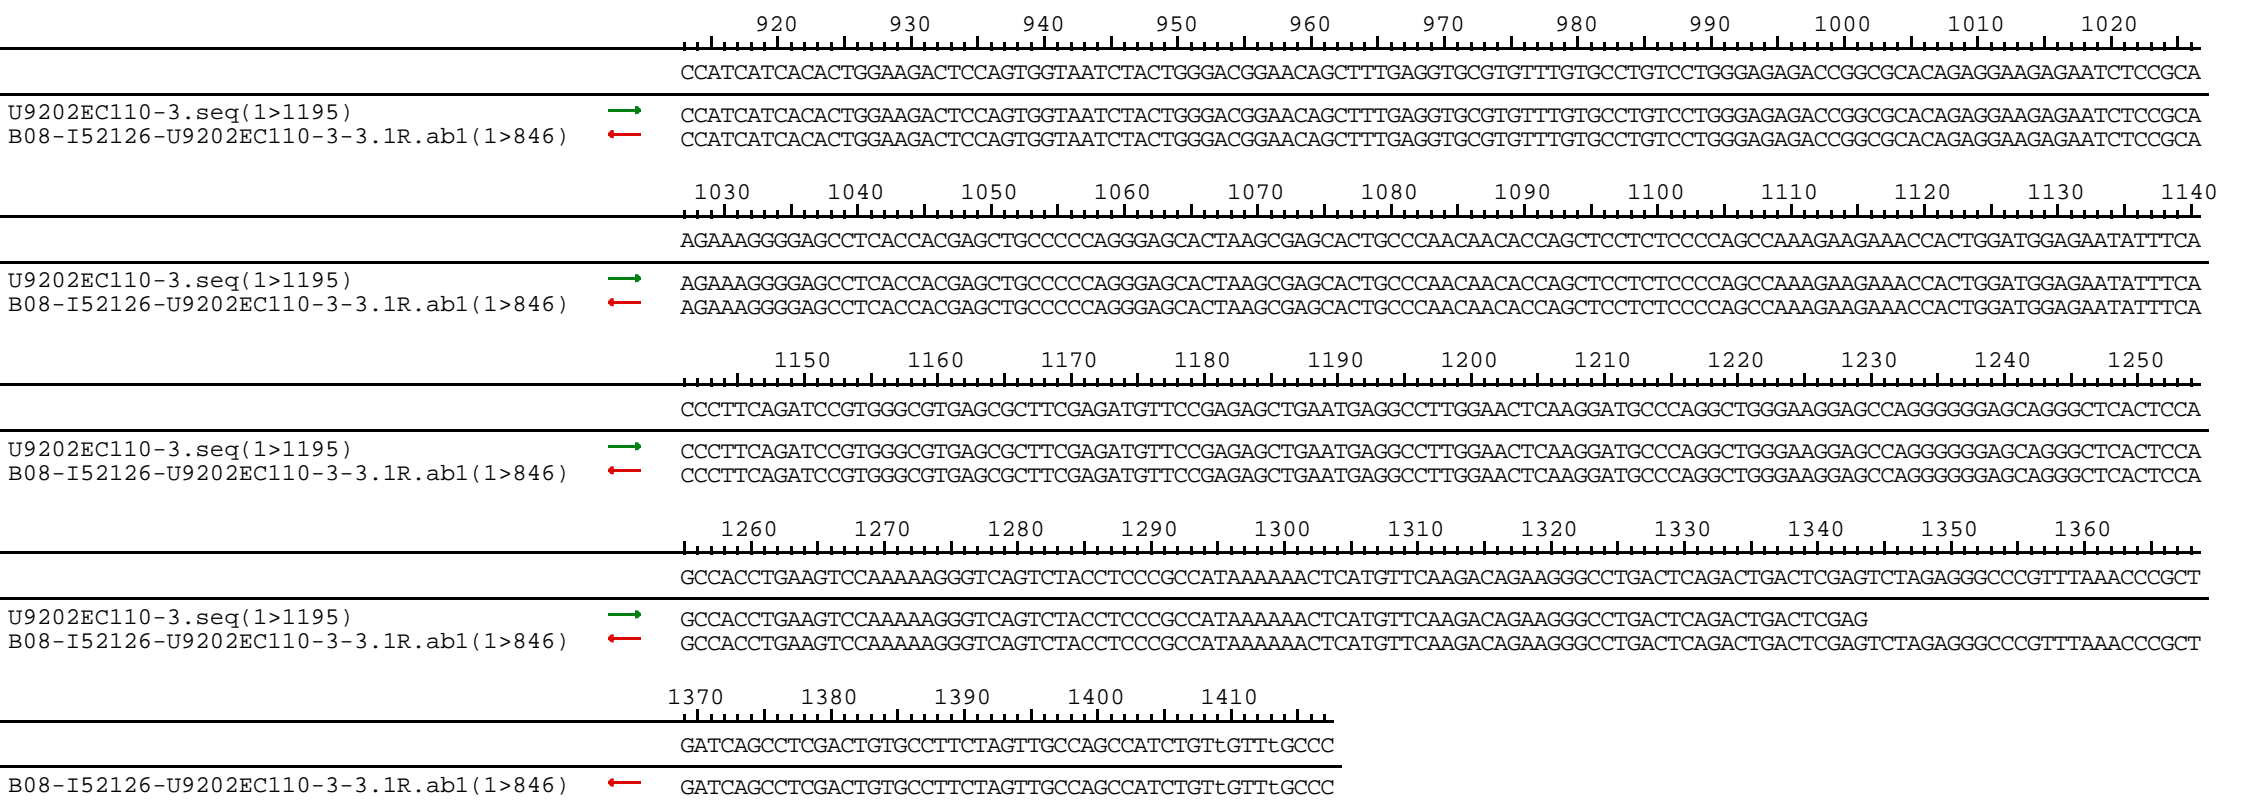

Supplement: s1 [file s1]
